# Supplementary material for: Experimentally validated inverse design of multi-property Fe-Co-Ni alloys
Source: PubMed Central journal article supplement — iScience. 2024 Apr 10;27(5):109723. doi: 10.1016/j.isci.2024.109723 (PMC11068641; doi:10.1016/j.isci.2024.109723), 2024-04-10
Supplement: mmc1.pdf [file mmc1.pdf]

iScience, Volume 27

## **Supplemental information**

### **Experimentally validated inverse design of multi-property Fe-Co-Ni alloys**

**Shakti P. Padhy, Varun Chaudhary, Yee-Fun Lim, Ruiming Zhu, Muang Thway, Kedar Hippalgaonkar, and Raju V. Ramanujan**

## S1. Distribution of the properties

**Figure S1** shows the distribution of  $M_s$  (T),  $H_c$  (A/m),  $T_c$  (K),  $\rho$  ( $\mu\Omega \cdot cm$ ),  $\sigma$  (MPa),  $\sigma_y$  (MPa),  $\delta$  (%),  $H_V$  (HV) and  $Cost$  (USD/kg). It can be observed that the reported  $M_s$ ,  $H_c$ ,  $T_c$ ,  $\rho$ , and  $\delta$  values are more concentrated to values in the range 2-2.5 T, 0-500 A/m, 1150-1250 K, 0-20  $\mu\Omega \cdot cm$ , and 0-10%, respectively.  $\sigma$ ,  $\sigma_y$ ,  $H_V$ , and  $Cost$  have a uniform distribution over large range of values but have comparative less data for respective higher values. From the perspective of the machine learning process for designing alloys, both attractive and unattractive property values are beneficial and reduce the bias in model building and prediction.

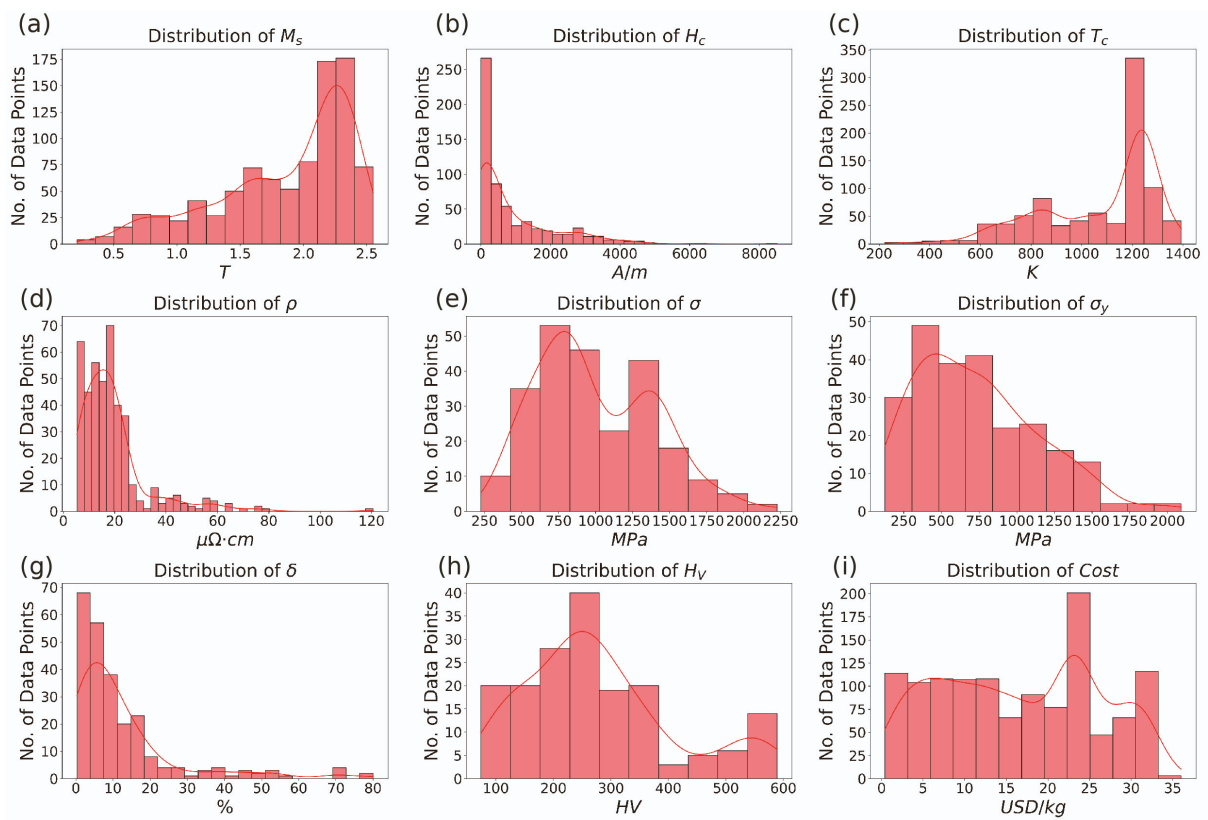

**Figure S1.** Distribution of (a)-(c) magnetic properties ( $M_s$ ,  $H_c$ ,  $T_c$ ), (d) electrical resistivity ( $\rho$ ), (e)-(h) mechanical properties ( $\sigma$ ,  $\sigma_y$ ,  $\delta$ ,  $H_V$ ), and (w) Cost in the database. The solid continuous lines are kernel density estimations which show the probability density function of the data entries for each property.

## S2. Hyperparameter optimization and model building for imputation strategy

The 12 types of ML models used in the imputation strategy, as explained in *Section 3*, are:

- (i) Linear Regression (Linear),
- (ii) Ridge Regression (Ridge),

- (iii) Lasso Regression (Lasso),
- (iv) K-Nearest Neighbors Regression (KNNR),
- (v) Support Vector Regression (SVR),
- (vi) Decision Tree Regression (DTR),
- (vii) Gradient Boosting Regression (GBR),
- (viii) Random Forest Regression (RFR),
- (ix) Extra Trees Regression (ETR),
- (x) XGBoost Regression (XGBR),
- (xi) Deep Neural Network Regression with same number of units in all the hidden layers (DNNR\_rectangle), and
- (xii) Deep Neural Network Regression with different number of units in all the hidden layers (DNNR\_random).

A 5-fold cross validation hyperparameter optimization for all the models, except Linear and DNN models, was performed. For Lasso and Ridge, LassoCV and RidgeCV was used from *Scikit-Learn* respectively to optimize hyperparameters. By default, LassoCV and RidgeCV incorporate 5-fold cross validation to find the optimized alpha and for this training data (80% of total no. of data points) was used. For DNN models, the Hyperband<sup>1</sup> algorithm was used from *KerasTuner*<sup>2</sup> to obtain optimized hyperparameters. For other models, *gp\_minimize* (Bayesian Optimization algorithm based on Gaussian process) from *Scikit-Optimize*<sup>3</sup> was used for hyperparameter optimization with a target to minimize the objective function of average of mean absolute error (MAE) for 5-fold cross validation on training data set (80% of total no. of data points). The BO algorithm followed in this function is described in **Table S1** below. According to the imputation strategy narrated in **Section 2.2**, the list of various ML regression models used and their selected hyperparameters for optimization is shown in **Table S2**. In **Table S3**, optimized hyperparameters value for each step of the imputation strategy is reported.

**Table S1.** BO algorithm followed in *gp\_minimize* from *Scikit-Optimize*<sup>3</sup>

- 
1. The gains are initialized,  $g_i = 0$
  2. **for**  $t=1, 2, 3, \dots$  **do**
  3. Each acquisition functions is optimized independently to propose a candidate  $X_i$ . A total of 10000 candidates are proposed.
  4. Out of 10000 candidates, the next  $X_{best}$  is chosen using  $softmax(\eta g_i)$ .

5. The surrogate model (Gaussian Process regression to model the defined objective function) is fitted with  $(X_{best}, Y_{best})$ .
6. The gains are updated,  $g_i \leftarrow \mu(X_i)$
7. **end for**

**Table S2.** Different ML regression models and their hyperparameters used for optimization for imputation strategy

| ML Regression Models | Hyperparameters for optimization                                                                              |
|----------------------|---------------------------------------------------------------------------------------------------------------|
| Linear               | –                                                                                                             |
| Ridge                | alpha                                                                                                         |
| Lasso                | alpha                                                                                                         |
| KNNR                 | n_neighbors, algorithm, leaf_size, p                                                                          |
| SVR                  | kernel, gamma, C                                                                                              |
| DTR                  | criterion, splitter, max_depth                                                                                |
| GBR                  | learning_rate, loss, n_estimators, max_depth, alpha                                                           |
| RFR                  | n_estimators, max_depth                                                                                       |
| ETR                  | n_estimators, max_depth                                                                                       |
| XGBR                 | eta, n_estimators, max_depth, subsample, colsample_bytree                                                     |
| DNNR_rectangle       | num_dense_layers, units (same for all dense layers), activation, learning_rate, optimizer, batch_size, epochs |
| DNNR_random          | units (for each dense layer), activation, learning_rate, optimizer, batch_size, epochs                        |

**Table S3.** Optimized hyperparameters value for different ML regression models for imputation strategy

| Mapping                                                  | ML Regression Models | Optimized Hyperparameters value                                                            |
|----------------------------------------------------------|----------------------|--------------------------------------------------------------------------------------------|
| Composition<br>to $M_s$<br>(no. of data<br>points = 907) | Linear               | -                                                                                          |
|                                                          | Ridge                | alpha = 7.478                                                                              |
|                                                          | Lasso                | alpha = 0.0024                                                                             |
|                                                          | KNNR                 | n_neighbors = 9, algorithm = 'auto', leaf_size = 1, p = 1                                  |
|                                                          | SVR                  | kernel = 'rbf', gamma = 0.0051, C = 100                                                    |
|                                                          | DTR                  | criterion = 'absolute_error', splitter = 'random', max_depth = 21                          |
|                                                          | GBR                  | learning_rate = 0.094, loss = 'quantile', n_estimators = 677, max_depth = 50, alpha = 0.55 |
|                                                          | RFR                  | n_estimators = 2000, max_depth = 18                                                        |
|                                                          | ETR                  | n_estimators = 1337, max_depth = 26                                                        |

|                                                          |                |                                                                                                                                                                                                                                |
|----------------------------------------------------------|----------------|--------------------------------------------------------------------------------------------------------------------------------------------------------------------------------------------------------------------------------|
|                                                          | XGBR           | eta = 0.149, n_estimators = 139, max_depth = 20, subsample = 1, colsample_bytree = 0.794                                                                                                                                       |
|                                                          | DNNR_rectangle | num_dense_layers = 2, units (same for all dense layers) = 73, activation = 'relu', learning_rate = 0.0262, optimizer = 'Adam', batch_size = 43, epochs = 100                                                                   |
|                                                          | DNNR_random    | num_dense_layers (same as DNNR_rectangle) = 2, units (for each dense layer) = (156, 34), activation = 'relu', learning_rate = 0.008, optimizer = 'RMSprop', batch_size = 8, epochs = 100                                       |
| Composition to $\log_{10}H_c$ (no. of data points = 602) | Linear         | -                                                                                                                                                                                                                              |
|                                                          | Ridge          | alpha = 5.719                                                                                                                                                                                                                  |
|                                                          | Lasso          | alpha = 0.102                                                                                                                                                                                                                  |
|                                                          | KNNR           | n_neighbors = 3, algorithm = 'brute', leaf_size = 50, p = 1                                                                                                                                                                    |
|                                                          | SVR            | kernel = 'rbf', gamma = 0.194, C = 90.414                                                                                                                                                                                      |
|                                                          | DTR            | criterion = 'absolute_error', splitter = 'random', max_depth = 18                                                                                                                                                              |
|                                                          | GBR            | learning_rate = 0.036, loss = 'huber', n_estimators = 95, max_depth = 7, alpha = 0.012                                                                                                                                         |
|                                                          | RFR            | n_estimators = 227, max_depth = 11                                                                                                                                                                                             |
|                                                          | ETR            | n_estimators = 347, max_depth = 12                                                                                                                                                                                             |
|                                                          | XGBR           | eta = 0.022, n_estimators = 179, max_depth = 20, subsample = 0.433, colsample_bytree = 1                                                                                                                                       |
|                                                          | DNNR_rectangle | num_dense_layers = 9, units (same for all dense layers) = 138, activation = 'tanh', learning_rate = 0.00065, optimizer = 'RMSprop', batch_size = 56, epochs = 100                                                              |
|                                                          | DNNR_random    | num_dense_layers (same as DNNR_rectangle) = 9, units (for each dense layer) = (686, 837, 456, 609, 987, 493, 749, 423, 71), activation = 'elu', learning_rate = 0.000084, optimizer = 'RMSprop', batch_size = 71, epochs = 100 |
| Composition to $\log_{10}T_c$ (no. of data points = 874) | Linear         | -                                                                                                                                                                                                                              |
|                                                          | Ridge          | alpha = 48.901                                                                                                                                                                                                                 |
|                                                          | Lasso          | alpha = 0.078                                                                                                                                                                                                                  |
|                                                          | KNNR           | n_neighbors = 9, algorithm = 'kd_tree', leaf_size = 1, p = 1                                                                                                                                                                   |
|                                                          | SVR            | kernel = 'rbf', gamma = 0.132, C = 100                                                                                                                                                                                         |
|                                                          | DTR            | criterion = 'squared_error', splitter = 'best', max_depth = 48                                                                                                                                                                 |
|                                                          | GBR            | learning_rate = 0.0086, loss = 'huber', n_estimators = 1000, max_depth = 41, alpha = 0.9                                                                                                                                       |
|                                                          | RFR            | n_estimators = 1, max_depth = 37                                                                                                                                                                                               |

|                                                             |                |                                                                                                                                                                                                    |
|-------------------------------------------------------------|----------------|----------------------------------------------------------------------------------------------------------------------------------------------------------------------------------------------------|
|                                                             | ETR            | n_estimators = 282, max_depth = 44                                                                                                                                                                 |
|                                                             | XGBR           | eta = 0.456, n_estimators = 148, max_depth = 20, subsample = 1, colsample_bytree = 1                                                                                                               |
|                                                             | DNNR_rectangle | num_dense_layers = 4, units (same for all dense layers) = 48, activation = 'relu', learning_rate = 0.0027, optimizer = 'Adam', batch_size = 47, epochs = 100                                       |
|                                                             | DNNR_random    | num_dense_layers (same as DNNR_rectangle) = 4, units (for each dense layer) = (389, 111, 139, 249), activation = 'tanh', learning_rate = 0.0022, optimizer = 'Adam', batch_size = 95, epochs = 100 |
| Composition to $\log_{10}\rho$ (no. of data points = 421)   | Linear         | -                                                                                                                                                                                                  |
|                                                             | Ridge          | alpha = 21.868                                                                                                                                                                                     |
|                                                             | Lasso          | alpha = 0.012                                                                                                                                                                                      |
|                                                             | KNNR           | n_neighbors = 4, algorithm = 'ball_tree', leaf_size = 1, p = 1                                                                                                                                     |
|                                                             | SVR            | kernel = 'rbf', gamma = 0.574, C = 28.092                                                                                                                                                          |
|                                                             | DTR            | criterion = 'squared_error', splitter = 'random', max_depth = 39                                                                                                                                   |
|                                                             | GBR            | learning_rate = 0.0175, loss = 'absolute_error', n_estimators = 924, max_depth = 39, alpha = 0.248                                                                                                 |
|                                                             | RFR            | n_estimators = 2000, max_depth = 25                                                                                                                                                                |
|                                                             | ETR            | n_estimators = 383, max_depth = 16                                                                                                                                                                 |
|                                                             | XGBR           | eta = 0.082, n_estimators = 200, max_depth = 8, subsample = 0.403, colsample_bytree = 1                                                                                                            |
|                                                             | DNNR_rectangle | num_dense_layers = 2, units (same for all dense layers) = 469, activation = 'tanh', learning_rate = 0.00019, optimizer = 'Adam', batch_size = 22, epochs = 100                                     |
|                                                             | DNNR_random    | num_dense_layers (same as DNNR_rectangle) = 62 units (for each dense layer) = (828, 118), activation = 'tanh', learning_rate = 0.00036, optimizer = 'Adam', batch_size = 18, epochs = 100          |
| Composition to $\log_{10}\delta$ (no. of data points = 246) | Linear         | -                                                                                                                                                                                                  |
|                                                             | Ridge          | alpha = 21.868                                                                                                                                                                                     |
|                                                             | Lasso          | alpha = 0.000001                                                                                                                                                                                   |
|                                                             | KNNR           | n_neighbors = 3, algorithm = 'auto', leaf_size = 50, p = 1                                                                                                                                         |
|                                                             | SVR            | kernel = 'rbf', gamma = 0.013, C = 100                                                                                                                                                             |
|                                                             | DTR            | criterion = 'absolute_error', splitter = 'random', max_depth = 16                                                                                                                                  |
|                                                             | GBR            | learning_rate = 0.024, loss = 'absolute_error', n_estimators = 354, max_depth = 7, alpha = 0.028                                                                                                   |

|                                                                 |                |                                                                                                                                                                                                               |
|-----------------------------------------------------------------|----------------|---------------------------------------------------------------------------------------------------------------------------------------------------------------------------------------------------------------|
|                                                                 | RFR            | n_estimators = 390, max_depth = 40                                                                                                                                                                            |
|                                                                 | ETR            | n_estimators = 7, max_depth = 12                                                                                                                                                                              |
|                                                                 | XGBR           | eta = 0.0848, n_estimators = 168, max_depth = 16, subsample = 0.405, colsample_bytree = 0.213                                                                                                                 |
|                                                                 | DNNR_rectangle | num_dense_layers = 6, units (same for all dense layers) = 431, activation = 'elu', learning_rate = 0.000084, optimizer = 'Adam', batch_size = 9, epochs = 100                                                 |
|                                                                 | DNNR_random    | num_dense_layers (same as DNNR_rectangle) = 6, units (for each dense layer) = (579, 627, 291, 431, 410, 877), activation = 'tanh', learning_rate = 0.00027, optimizer = 'Adam', batch_size = 32, epochs = 100 |
| $\log_{10}\sigma$ to $\log_{10}H_V$ (no. of data points = 106)  | Linear         | -                                                                                                                                                                                                             |
|                                                                 | Ridge          | alpha = 0.000001                                                                                                                                                                                              |
|                                                                 | Lasso          | alpha = 0.000001                                                                                                                                                                                              |
|                                                                 | KNNR           | n_neighbors = 5, algorithm = 'auto', leaf_size = 1, p = 1                                                                                                                                                     |
|                                                                 | SVR            | kernel = 'rbf', gamma = 0.022, C = 96.342                                                                                                                                                                     |
|                                                                 | DTR            | criterion = 'squared_error', splitter = 'random', max_depth = 7                                                                                                                                               |
|                                                                 | GBR            | learning_rate = 0.021, loss = 'squared_error', n_estimators = 947, max_depth = 1, alpha = 0.9                                                                                                                 |
|                                                                 | RFR            | n_estimators = 596, max_depth = 4                                                                                                                                                                             |
|                                                                 | ETR            | n_estimators = 49, max_depth = 4                                                                                                                                                                              |
|                                                                 | XGBR           | eta = 0.205, n_estimators = 92, max_depth = 1, subsample = 0.161, colsample_bytree = 0.005                                                                                                                    |
| $\log_{10}\sigma_y$ to $\log_{10}H_V$ (no. of data points = 89) | Linear         | -                                                                                                                                                                                                             |
|                                                                 | Ridge          | alpha = 0.391                                                                                                                                                                                                 |
|                                                                 | Lasso          | alpha = 0.000001                                                                                                                                                                                              |
|                                                                 | KNNR           | n_neighbors = 12, algorithm = 'ball-tree', leaf_size = 45, p = 5                                                                                                                                              |
|                                                                 | SVR            | kernel = 'sigmoid', gamma = 0.05, C = 100                                                                                                                                                                     |
|                                                                 | DTR            | criterion = 'squared_error', splitter = 'random', max_depth = 9                                                                                                                                               |
|                                                                 | GBR            | learning_rate = 0.058, loss = 'quantile', n_estimators = 521, max_depth = 34, alpha = 0.211                                                                                                                   |
|                                                                 | RFR            | n_estimators = 7, max_depth = 41                                                                                                                                                                              |
|                                                                 | ETR            | n_estimators = 2000, max_depth = 6                                                                                                                                                                            |
|                                                                 | XGBR           | eta = 1, n_estimators = 104, max_depth = 1, subsample = 1, colsample_bytree = 0.005                                                                                                                           |
|                                                                 | Linear         | -                                                                                                                                                                                                             |

|                                                                   |                |                                                                                                                                                                                                                                 |
|-------------------------------------------------------------------|----------------|---------------------------------------------------------------------------------------------------------------------------------------------------------------------------------------------------------------------------------|
| Composition<br>to $\log_{10}H_V$<br>(no. of data<br>points = 331) | Ridge          | alpha = 37.395                                                                                                                                                                                                                  |
|                                                                   | Lasso          | alpha = 0.035                                                                                                                                                                                                                   |
|                                                                   | KNNR           | n_neighbors = 4, algorithm = 'kd_tree', leaf_size = 50, p = 1                                                                                                                                                                   |
|                                                                   | SVR            | kernel = 'rbf', gamma = 0.085, C = 100                                                                                                                                                                                          |
|                                                                   | DTR            | criterion = 'absolute_error', splitter = 'random', max_depth = 17                                                                                                                                                               |
|                                                                   | GBR            | learning_rate = 0.052, loss = 'quantile', n_estimators = 280,<br>max_depth = 50, alpha = 0.373                                                                                                                                  |
|                                                                   | RFR            | n_estimators = 135, max_depth = 10                                                                                                                                                                                              |
|                                                                   | ETR            | n_estimators = 1424, max_depth = 15                                                                                                                                                                                             |
|                                                                   | XGBR           | eta = 0.033, n_estimators = 86, max_depth = 14, subsample =<br>0.858, colsample_bytree = 1                                                                                                                                      |
|                                                                   | DNNR_rectangle | num_dense_layers = 8, units (same for all dense layers) = 385,<br>activation = 'tanh', learning_rate = 0.0021, optimizer = 'SGD',<br>batch_size = 48, epochs = 100                                                              |
|                                                                   | DNNR_random    | num_dense_layers (same as DNNR_rectangle) = 8, units (for<br>each dense layer) = (345, 623, 985, 170, 251, 416, 473, 858),<br>activation = 'elu', learning_rate = 0.00028, optimizer = 'Adam',<br>batch_size = 59, epochs = 100 |

### S3. Hyperparameter optimization and performance of multi-property models

After filling the empty spaces in database using the imputation strategy, the filled database of 1208 data points was used to build multi-property predictive models as described in *Section 2.3*. **Table S4** describes the ML regression models used and their selected hyperparameters for optimization. The optimization of hyperparameters is performed in a similar way as narrated in **Section S2**. For each of the ML regression models, the optimized hyperparameters value for the models RFR, ETR, DNNR\_rectangle and DNNR\_random and set hyperparameters value for the models NNR\_3layers and NNR\_4layers in **Table S5**.

**Table S4.** Different multi-property ML regression models and their hyperparameters used for optimization

| ML Regression Models | Hyperparameters for optimization                             |
|----------------------|--------------------------------------------------------------|
| RFR                  | n_estimators, max_depth, min_samples_split, min_samples_leaf |



|                |                                                                                                                  |
|----------------|------------------------------------------------------------------------------------------------------------------|
| ETR            | n_estimators, max_depth, min_samples_split, min_samples_leaf                                                     |
| DNNR_rectangle | num_dense_layers, units (same for all dense layers), activation,<br>learning_rate, optimizer, batch_size, epochs |
| DNNR_random    | units (for each dense layer), activation, learning_rate, optimizer,<br>batch_size, epochs                        |

**Table S5.** Optimized hyperparameters value for different multi-property ML regression models

| ML Regression Models | Optimized/Set Hyperparameters value                                                                                                                                                                                                                    |
|----------------------|--------------------------------------------------------------------------------------------------------------------------------------------------------------------------------------------------------------------------------------------------------|
| RFR                  | n_estimators = 139, max_depth = 72, min_samples_split = 2,<br>min_samples_leaf = 1                                                                                                                                                                     |
| ETR                  | n_estimators = 230, max_depth = 81, min_samples_split = 2,<br>min_samples_leaf = 1                                                                                                                                                                     |
| NNR_3layers          | num_dense_layers = 3, units = (128,64,32), activation = 'relu', initially<br>learning_rate is 0.0001 but it is adaptive, optimizer = 'Adam',<br>batch_size = 32, epochs = 96                                                                           |
| NNR_4layers          | num_dense_layers = 4, units = (256,128,64,32), activation = 'relu',<br>initially learning_rate is 0.0001 but it is adaptive, optimizer = 'Adam',<br>batch_size = 32, epochs = 96                                                                       |
| DNNR_rectangle       | num_dense_layers = 11, units (same for all dense layers) = 356,<br>activation = 'tanh', learning_rate = 0.000092, optimizer = 'Adam',<br>batch_size = 27, epochs = 100                                                                                 |
| DNNR_random          | num_dense_layers (same as DNNR_rectangle) = 12, units (for each<br>dense layer) = (1057, 936, 805, 1320, 954, 46, 705, 1173, 1474, 752,<br>259, 808), activation = 'tanh', learning_rate = 0.0063, optimizer = 'SGD',<br>batch_size = 72, epochs = 100 |

The same hyperparameters value was used for multi-property ML regressors with composition and Wen alloy physical descriptors as input features except for epochs in NNR\_3layers\_Wen and NNR\_4layers\_Wen models which was set to 128.

As mentioned in *Section 3.3.1*, the predicted vs. experimental values along with the performance metrics of each property for both training and testing set for the 4 models – ETR, ETR\_Wen, NNR\_4layers, and NNR\_4layers\_Wen, are shown in **Figure S2**, **Figure S3**, **Figure S4**, and **Figure S5**, respectively.

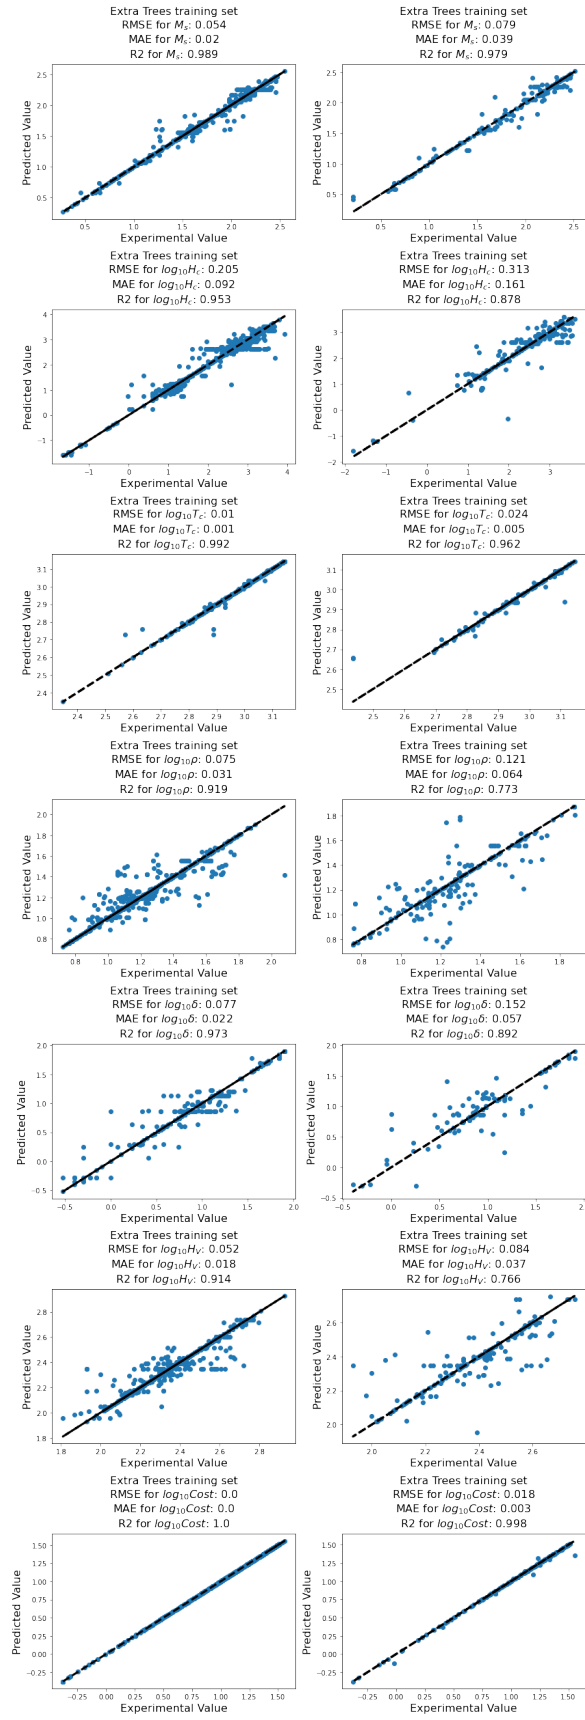

**Figure S2.** Predicted vs. Experimental values and performance metrics (RMSE, MAE,  $R^2$ ) of  $M_s$ ,  $\log_{10}H_c$ ,  $\log_{10}T_c$ ,  $\log_{10}\rho$ ,  $\log_{10}\delta$ ,  $\log_{10}H_V$ , and  $\log_{10}Cost$  (in series from top to bottom) for training (all plots on left) and testing (all plots on right) sets for ETR model.

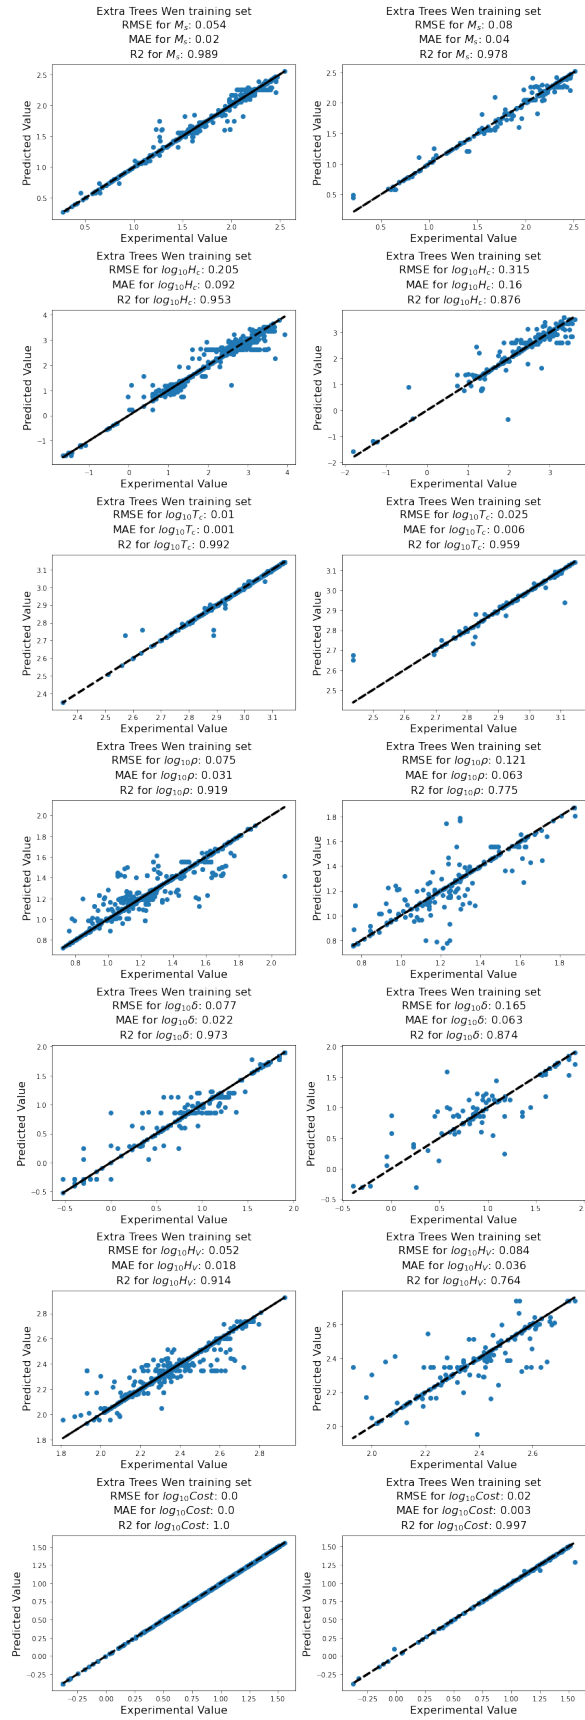

**Figure S3.** Predicted vs. Experimental values and performance metrics (RMSE, MAE,  $R^2$ ) of  $M_s$ ,  $\log_{10}H_c$ ,  $\log_{10}T_c$ ,  $\log_{10}\rho$ ,  $\log_{10}\delta$ ,  $\log_{10}H_V$ , and  $\log_{10}Cost$  (in series from top to bottom) for training (all plots on left) and testing (all plots on right) sets for ETR\_Wen model.

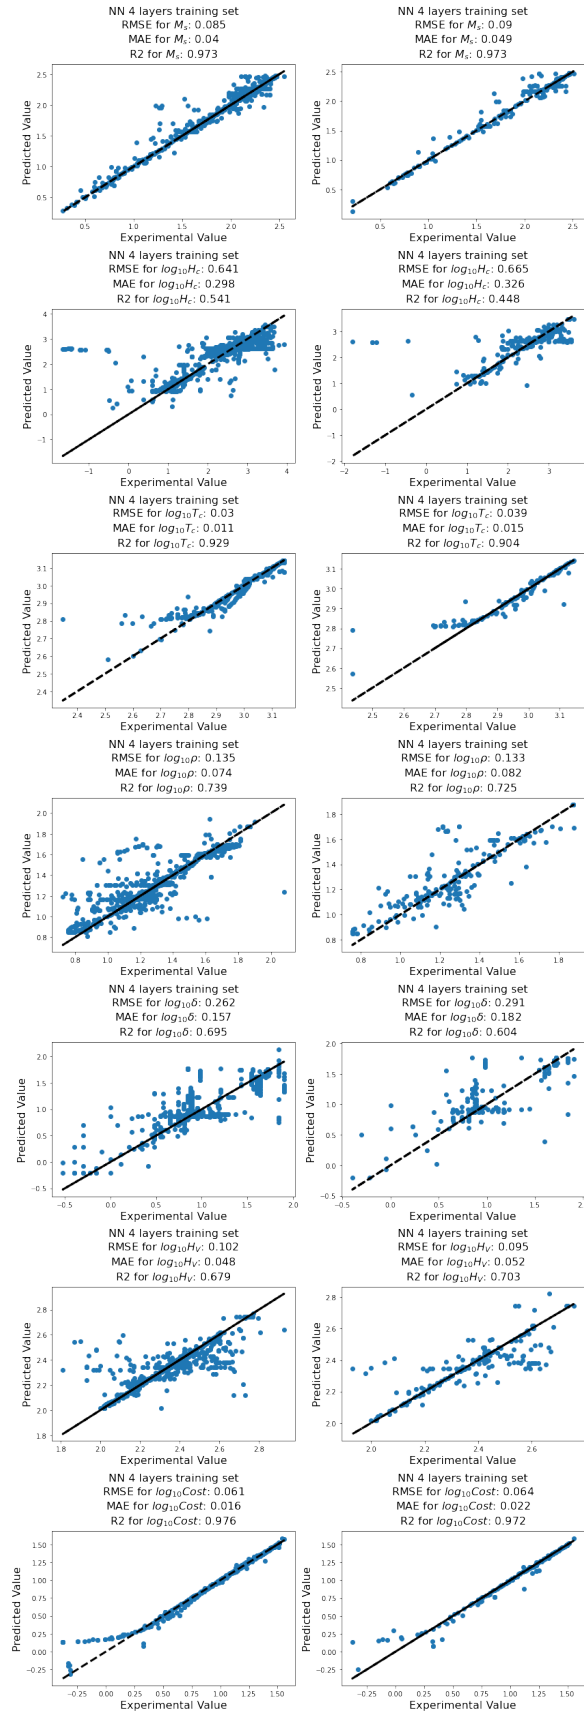

**Figure S4.** Predicted vs. Experimental values and performance metrics (RMSE, MAE,  $R^2$ ) of  $M_s$ ,  $\log_{10}H_c$ ,  $\log_{10}T_c$ ,  $\log_{10}\rho$ ,  $\log_{10}\delta$ ,  $\log_{10}H_v$ , and  $\log_{10}Cost$  (in series from top to bottom) for training (all plots on left) and testing (all plots on right) sets for NNR\_4layers model.

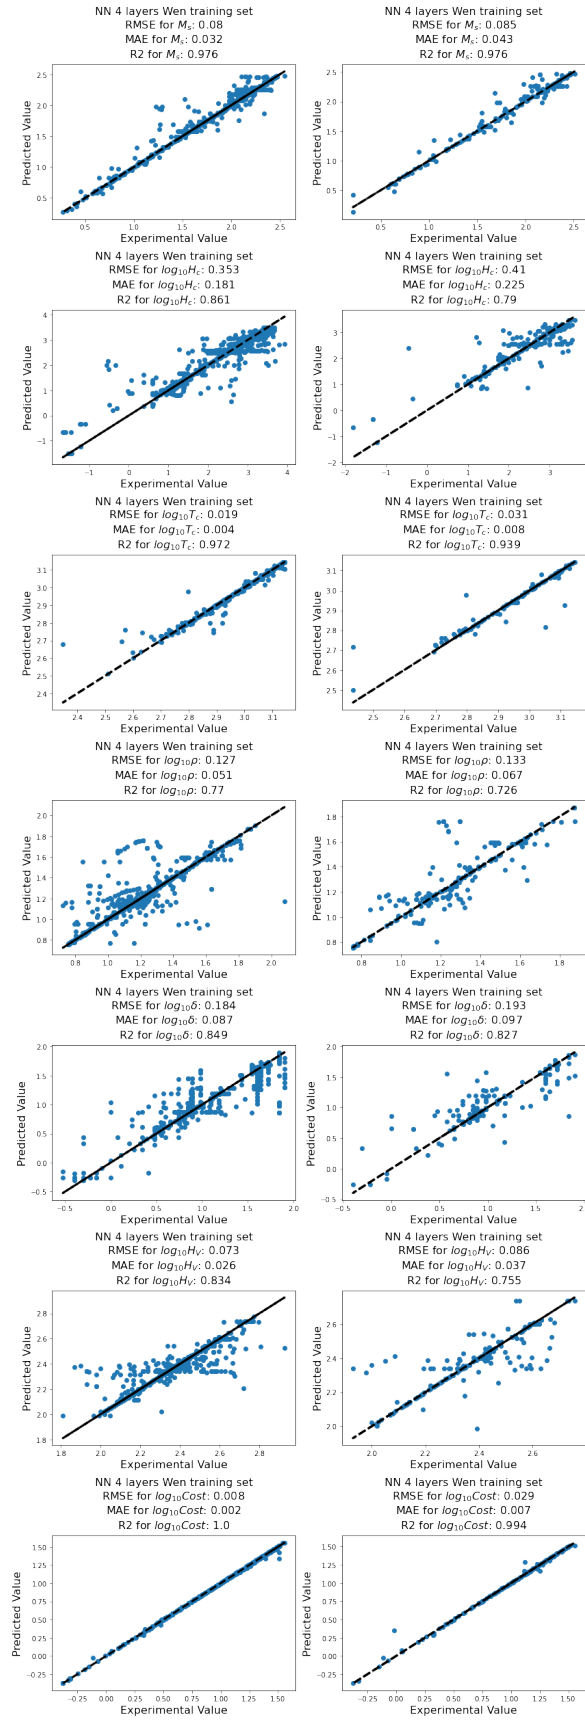

**Figure S5.** Predicted vs. Experimental values and performance metrics (RMSE, MAE, R<sup>2</sup>) of  $M_s$ ,  $\log_{10}H_c$ ,  $\log_{10}T_c$ ,  $\log_{10}\rho$ ,  $\log_{10}\delta$ ,  $\log_{10}H_V$ , and  $\log_{10}Cost$  (in series from top to bottom) for training (all plots on left) and testing (all plots on right) sets for NNR\_4layers\_Wen model.

## S4. Experimental Validation of Forward Design Model

The forward design model was experimentally validated using 40 compositions. Based on the predictions of the ETR model, absolute error between the predicted property value and experimental property value for each experimental composition and finally the MAE of the predictions were calculated and tabulated in **Table S6**, **Table S7**, **Table S8**, **Table S9**, **Table S10**, and **Table S11** for  $M_s$ ,  $\log_{10}H_c$ ,  $\log_{10}T_c$ ,  $\log_{10}\rho$ ,  $\log_{10}H_V$ , and  $\log_{10}Cost$  respectively. Similarly, the absolute errors and MAE were calculated and tabulated in Tables below for  $M_s$ ,  $\log_{10}H_c$ ,  $\log_{10}T_c$ ,  $\log_{10}\rho$ ,  $\log_{10}H_V$ , and  $\log_{10}Cost$ , respectively, based on NNR\_4layers\_Wen model predictions. The deviation percentage of predictions from experimental values are calculated by the following formula:

$$Deviation \% = \frac{Predicted - Actual}{Predicted} \times 100$$

Using this formula, for each property the number of compositions within the  $\pm 10\%$  deviation range is estimated and mentioned after each table.

**Table S6.** Prediction, absolute error, and MAE of  $M_s$  by the ETR model for 40 experimental compositions

| S. No. | Fe (at.%) | Co (at.%) | Ni (at.%) | Experimental | Predicted | Absolute |
|--------|-----------|-----------|-----------|--------------|-----------|----------|
|        |           |           |           | $M_s$ (T)    | $M_s$ (T) | error    |
| 1      | 10.47     | 39.7      | 49.83     | 1.37         | 1.297     | 0.073    |
| 2      | 10.47     | 29.76     | 59.77     | 1.18         | 1.212     | 0.032    |
| 3      | 10.47     | 19.83     | 69.7      | 1.08         | 1.103     | 0.023    |
| 4      | 10.46     | 9.91      | 79.63     | 0.95         | 0.967     | 0.017    |
| 5      | 20.82     | 9.86      | 69.32     | 1.31         | 1.179     | 0.131    |
| 6      | 31.07     | 9.81      | 59.12     | 1.29         | 1.404     | 0.114    |
| 7      | 41.22     | 9.76      | 49.02     | 1.41         | 1.595     | 0.185    |
| 8      | 34.49     | 32.69     | 32.82     | 1.6          | 1.91      | 0.31     |
| 9      | 41.28     | 48.9      | 9.82      | 1.97         | 2.154     | 0.184    |
| 10     | 31.13     | 59        | 9.87      | 1.91         | 2.204     | 0.294    |
| 11     | 20.87     | 69.2      | 9.93      | 1.88         | 2.025     | 0.145    |
| 12     | 10.49     | 79.53     | 9.98      | 1.87         | 1.882     | 0.012    |
| 13     | 10.49     | 69.55     | 19.96     | 1.69         | 1.85      | 0.16     |
| 14     | 10.48     | 59.6      | 29.92     | 1.6          | 1.567     | 0.033    |

|                           |       |       |       |      |       |       |
|---------------------------|-------|-------|-------|------|-------|-------|
| 15                        | 10.48 | 49.64 | 39.88 | 1.5  | 1.394 | 0.106 |
| 16                        | 51.32 | 38.91 | 9.77  | 2.12 | 2.215 | 0.095 |
| 17                        | 61.26 | 29.03 | 9.71  | 2.09 | 2.261 | 0.171 |
| 18                        | 71.09 | 19.25 | 9.66  | 2.03 | 2.271 | 0.241 |
| 19                        | 80.82 | 9.57  | 9.61  | 1.92 | 2.268 | 0.348 |
| 20                        | 71.06 | 9.62  | 19.32 | 1.69 | 2.192 | 0.502 |
| 21                        | 61.21 | 9.67  | 29.12 | 1.43 | 1.95  | 0.52  |
| 22                        | 51.26 | 9.72  | 39.02 | 1.47 | 1.737 | 0.267 |
| 23                        | 71.08 | 14.43 | 14.49 | 2    | 2.229 | 0.229 |
| 24                        | 61.24 | 19.34 | 19.42 | 1.94 | 2.175 | 0.235 |
| 25                        | 51.3  | 24.3  | 24.4  | 1.83 | 2.132 | 0.302 |
| 26                        | 41.25 | 29.32 | 29.43 | 1.77 | 2.051 | 0.281 |
| 27                        | 31.1  | 34.38 | 34.52 | 1.65 | 1.9   | 0.25  |
| 28                        | 20.84 | 39.5  | 39.66 | 1.51 | 1.578 | 0.068 |
| 29                        | 41.27 | 39.1  | 19.63 | 1.8  | 2.05  | 0.25  |
| 30                        | 36.19 | 34.29 | 29.52 | 1.75 | 1.999 | 0.249 |
| 31                        | 31.1  | 29.46 | 39.44 | 1.58 | 1.721 | 0.141 |
| 32                        | 25.97 | 24.61 | 49.42 | 1.44 | 1.456 | 0.016 |
| 33                        | 20.82 | 19.73 | 59.45 | 1.35 | 1.257 | 0.093 |
| 34                        | 15.65 | 14.83 | 69.52 | 1.17 | 1.144 | 0.026 |
| 35                        | 41.23 | 19.54 | 39.23 | 1.64 | 1.72  | 0.08  |
| 36                        | 36.18 | 29.39 | 34.43 | 1.71 | 1.864 | 0.154 |
| 37                        | 31.1  | 39.3  | 29.6  | 1.71 | 2.051 | 0.341 |
| 38                        | 25.99 | 49.27 | 24.74 | 1.73 | 2.082 | 0.352 |
| 39                        | 20.86 | 59.29 | 19.85 | 1.73 | 1.826 | 0.096 |
| 40                        | 15.69 | 69.38 | 14.93 | 1.76 | 1.952 | 0.192 |
| Mean Absolute Error (MAE) |       |       |       |      |       | 0.183 |

The ETR model was able to predict the  $M_s$  of 22 compositions within  $\pm 10\%$  deviation range compared to experimental values.

**Table S7.** Prediction, absolute error, and MAE of  $\log_{10}H_c$  by ETR model for 40 experimental compositions

| <b>S. No.</b> | <b>Fe (at.%)</b> | <b>Co (at.%)</b> | <b>Ni (at.%)</b> | <b>Experimental <math>\log_{10}H_c</math> (<math>\log_{10}(\text{A/m})</math>)</b> | <b>Predicted <math>\log_{10}H_c</math> (<math>\log_{10}(\text{A/m})</math>)</b> | <b>Absolute error</b> |
|---------------|------------------|------------------|------------------|------------------------------------------------------------------------------------|---------------------------------------------------------------------------------|-----------------------|
| 1             | 10.47            | 39.7             | 49.83            | 3.144                                                                              | 2.771                                                                           | 0.373                 |
| 2             | 10.47            | 29.76            | 59.77            | 2.98                                                                               | 2.567                                                                           | 0.413                 |
| 3             | 10.47            | 19.83            | 69.7             | 2.961                                                                              | 2.353                                                                           | 0.608                 |
| 4             | 10.46            | 9.91             | 79.63            | 2.874                                                                              | 1.719                                                                           | 1.155                 |
| 5             | 20.82            | 9.86             | 69.32            | 2.591                                                                              | 1.605                                                                           | 0.986                 |
| 6             | 31.07            | 9.81             | 59.12            | 2.679                                                                              | 1.103                                                                           | 1.576                 |
| 7             | 41.22            | 9.76             | 49.02            | 2.223                                                                              | 1.089                                                                           | 1.134                 |
| 8             | 34.49            | 32.69            | 32.82            | 2.793                                                                              | 2.58                                                                            | 0.213                 |
| 9             | 41.28            | 48.9             | 9.82             | 3.062                                                                              | 3.494                                                                           | 0.432                 |
| 10            | 31.13            | 59               | 9.87             | 2.758                                                                              | 3.485                                                                           | 0.727                 |
| 11            | 20.87            | 69.2             | 9.93             | 2.7                                                                                | 3.112                                                                           | 0.412                 |
| 12            | 10.49            | 79.53            | 9.98             | 2.835                                                                              | 3.037                                                                           | 0.202                 |
| 13            | 10.49            | 69.55            | 19.96            | 3.001                                                                              | 2.796                                                                           | 0.205                 |
| 14            | 10.48            | 59.6             | 29.92            | 2.845                                                                              | 2.839                                                                           | 0.006                 |
| 15            | 10.48            | 49.64            | 39.88            | 2.85                                                                               | 2.861                                                                           | 0.011                 |
| 16            | 51.32            | 38.91            | 9.77             | 3.053                                                                              | 3.111                                                                           | 0.058                 |
| 17            | 61.26            | 29.03            | 9.71             | 3.053                                                                              | 2.863                                                                           | 0.19                  |
| 18            | 71.09            | 19.25            | 9.66             | 2.973                                                                              | 2.466                                                                           | 0.507                 |
| 19            | 80.82            | 9.57             | 9.61             | 3.091                                                                              | 2.713                                                                           | 0.378                 |
| 20            | 71.06            | 9.62             | 19.32            | 3.166                                                                              | 2.739                                                                           | 0.427                 |
| 21            | 61.21            | 9.67             | 29.12            | 3.062                                                                              | 2.078                                                                           | 0.984                 |
| 22            | 51.26            | 9.72             | 39.02            | 2.85                                                                               | 1.601                                                                           | 1.249                 |
| 23            | 71.08            | 14.43            | 14.49            | 3.322                                                                              | 2.626                                                                           | 0.696                 |
| 24            | 61.24            | 19.34            | 19.42            | 3.182                                                                              | 2.694                                                                           | 0.488                 |
| 25            | 51.3             | 24.3             | 24.4             | 2.942                                                                              | 2.947                                                                           | 0.005                 |
| 26            | 41.25            | 29.32            | 29.43            | 2.554                                                                              | 2.957                                                                           | 0.403                 |
| 27            | 31.1             | 34.38            | 34.52            | 2.457                                                                              | 2.388                                                                           | 0.069                 |
| 28            | 20.84            | 39.5             | 39.66            | 2.564                                                                              | 2.408                                                                           | 0.156                 |
| 29            | 41.27            | 39.1             | 19.63            | 2.922                                                                              | 3.122                                                                           | 0.2                   |



|                           |       |       |       |       |       |       |
|---------------------------|-------|-------|-------|-------|-------|-------|
| 30                        | 36.19 | 34.29 | 29.52 | 2.573 | 2.896 | 0.323 |
| 31                        | 31.1  | 29.46 | 39.44 | 2.625 | 1.577 | 1.048 |
| 32                        | 25.97 | 24.61 | 49.42 | 2.608 | 0.904 | 1.704 |
| 33                        | 20.82 | 19.73 | 59.45 | 2.672 | 2.245 | 0.427 |
| 34                        | 15.65 | 14.83 | 69.52 | 2.83  | 2.063 | 0.767 |
| 35                        | 41.23 | 19.54 | 39.23 | 2.686 | 1.605 | 1.081 |
| 36                        | 36.18 | 29.39 | 34.43 | 2.625 | 2.409 | 0.216 |
| 37                        | 31.1  | 39.3  | 29.6  | 2.686 | 2.946 | 0.26  |
| 38                        | 25.99 | 49.27 | 24.74 | 2.657 | 2.889 | 0.232 |
| 39                        | 20.86 | 59.29 | 19.85 | 2.617 | 2.618 | 0.001 |
| 40                        | 15.69 | 69.38 | 14.93 | 2.733 | 2.992 | 0.259 |
| Mean Absolute Error (MAE) |       |       |       |       |       | 0.515 |

The ETR model was able to predict the  $\log_{10}H_c$  of 16 compositions within  $\pm 10\%$  deviation range compared to experimental values.

**Table S8.** Prediction, absolute error, and MAE of  $\log_{10}T_c$  by ETR model for 40 experimental compositions

| S. No. | Fe (at.%) | Co (at.%) | Ni (at.%) | Experimental $\log_{10}T_c$ ( $\log_{10}(\text{K})$ ) | Predicted $\log_{10}T_c$ ( $\log_{10}(\text{K})$ ) | Absolute error |
|--------|-----------|-----------|-----------|-------------------------------------------------------|----------------------------------------------------|----------------|
| 1      | 10.47     | 39.7      | 49.83     | 3.032                                                 | 3.042                                              | 0.01           |
| 2      | 10.47     | 29.76     | 59.77     | 3.005                                                 | 3.01                                               | 0.005          |
| 3      | 10.47     | 19.83     | 69.7      | 2.971                                                 | 2.962                                              | 0.009          |
| 4      | 10.46     | 9.91      | 79.63     | 2.948                                                 | 2.899                                              | 0.049          |
| 5      | 20.82     | 9.86      | 69.32     | 2.954                                                 | 2.87                                               | 0.084          |
| 6      | 31.07     | 9.81      | 59.12     | 2.945                                                 | 2.926                                              | 0.019          |
| 7      | 41.22     | 9.76      | 49.02     | 2.951                                                 | 2.93                                               | 0.021          |
| 8      | 34.49     | 32.69     | 32.82     | 3.009                                                 | 2.991                                              | 0.018          |
| 9      | 41.28     | 48.9      | 9.82      | 3.063                                                 | 3.067                                              | 0.004          |
| 10     | 31.13     | 59        | 9.87      | 3.066                                                 | 3.092                                              | 0.026          |
| 11     | 20.87     | 69.2      | 9.93      | 3.103                                                 | 3.137                                              | 0.034          |
| 12     | 10.49     | 79.53     | 9.98      | 3.11                                                  | 3.111                                              | 0.001          |
| 13     | 10.49     | 69.55     | 19.96     | 3.09                                                  | 3.105                                              | 0.015          |

|                           |       |       |       |       |       |       |
|---------------------------|-------|-------|-------|-------|-------|-------|
| 14                        | 10.48 | 59.6  | 29.92 | 3.077 | 3.081 | 0.004 |
| 15                        | 10.48 | 49.64 | 39.88 | 3.06  | 3.057 | 0.003 |
| 16                        | 51.32 | 38.91 | 9.77  | 3.069 | 3.072 | 0.003 |
| 17                        | 61.26 | 29.03 | 9.71  | 3.064 | 3.056 | 0.008 |
| 18                        | 71.09 | 19.25 | 9.66  | 3.068 | 3.032 | 0.036 |
| 19                        | 80.82 | 9.57  | 9.61  | 3.018 | 3.006 | 0.012 |
| 20                        | 71.06 | 9.62  | 19.32 | 2.998 | 2.967 | 0.031 |
| 21                        | 61.21 | 9.67  | 29.12 | 2.943 | 2.848 | 0.095 |
| 22                        | 51.26 | 9.72  | 39.02 | 2.94  | 2.884 | 0.056 |
| 23                        | 71.08 | 14.43 | 14.49 | 3.007 | 2.999 | 0.008 |
| 24                        | 61.24 | 19.34 | 19.42 | 3     | 2.992 | 0.008 |
| 25                        | 51.3  | 24.3  | 24.4  | 3.015 | 2.987 | 0.028 |
| 26                        | 41.25 | 29.32 | 29.43 | 3.006 | 2.986 | 0.02  |
| 27                        | 31.1  | 34.38 | 34.52 | 3.037 | 2.996 | 0.041 |
| 28                        | 20.84 | 39.5  | 39.66 | 3.037 | 3.02  | 0.017 |
| 29                        | 41.27 | 39.1  | 19.63 | 3.024 | 3.012 | 0.012 |
| 30                        | 36.19 | 34.29 | 29.52 | 3.003 | 3.001 | 0.002 |
| 31                        | 31.1  | 29.46 | 39.44 | 3.01  | 2.98  | 0.03  |
| 32                        | 25.97 | 24.61 | 49.42 | 3.001 | 2.966 | 0.035 |
| 33                        | 20.82 | 19.73 | 59.45 | 2.988 | 2.951 | 0.037 |
| 34                        | 15.65 | 14.83 | 69.52 | 2.96  | 2.874 | 0.086 |
| 35                        | 41.23 | 19.54 | 39.23 | 2.975 | 2.939 | 0.036 |
| 36                        | 36.18 | 29.39 | 34.43 | 3.024 | 2.978 | 0.046 |
| 37                        | 31.1  | 39.3  | 29.6  | 3.028 | 3.015 | 0.013 |
| 38                        | 25.99 | 49.27 | 24.74 | 3.064 | 3.043 | 0.021 |
| 39                        | 20.86 | 59.29 | 19.85 | 3.064 | 3.091 | 0.027 |
| 40                        | 15.69 | 69.38 | 14.93 | 3.088 | 3.114 | 0.026 |
| Mean Absolute Error (MAE) |       |       |       |       |       | 0.026 |

The ETR model was able to predict the  $\log_{10}T_c$  of all 40 compositions within  $\pm 10\%$  deviation range compared to experimental values.

**Table S9.** Prediction, absolute error, and MAE of  $\log_{10} \rho$  by ETR model for 40 experimental compositions

| <b>S. No.</b> | <b>Fe (at.%)</b> | <b>Co (at.%)</b> | <b>Ni (at.%)</b> | <b>Experimental <math>\log_{10}\rho</math> (<math>\log_{10}(\mu\Omega\cdot\text{cm})</math>)</b> | <b>Predicted <math>\log_{10}\rho</math> (<math>\log_{10}(\mu\Omega\cdot\text{cm})</math>)</b> | <b>Absolute error</b> |
|---------------|------------------|------------------|------------------|--------------------------------------------------------------------------------------------------|-----------------------------------------------------------------------------------------------|-----------------------|
| 1             | 10.47            | 39.7             | 49.83            | 1.422                                                                                            | 1.042                                                                                         | 0.38                  |
| 2             | 10.47            | 29.76            | 59.77            | 1.31                                                                                             | 1.056                                                                                         | 0.254                 |
| 3             | 10.47            | 19.83            | 69.7             | 1.292                                                                                            | 1.055                                                                                         | 0.237                 |
| 4             | 10.46            | 9.91             | 79.63            | 1.281                                                                                            | 1.134                                                                                         | 0.147                 |
| 5             | 20.82            | 9.86             | 69.32            | 1.352                                                                                            | 1.164                                                                                         | 0.188                 |
| 6             | 31.07            | 9.81             | 59.12            | 1.423                                                                                            | 1.227                                                                                         | 0.196                 |
| 7             | 41.22            | 9.76             | 49.02            | 1.589                                                                                            | 1.372                                                                                         | 0.217                 |
| 8             | 34.49            | 32.69            | 32.82            | 1.423                                                                                            | 1.261                                                                                         | 0.162                 |
| 9             | 41.28            | 48.9             | 9.82             | 1.246                                                                                            | 1.069                                                                                         | 0.177                 |
| 10            | 31.13            | 59               | 9.87             | 1.193                                                                                            | 1.122                                                                                         | 0.071                 |
| 11            | 20.87            | 69.2             | 9.93             | 1.188                                                                                            | 1.153                                                                                         | 0.035                 |
| 12            | 10.49            | 79.53            | 9.98             | 1.196                                                                                            | 1.239                                                                                         | 0.043                 |
| 13            | 10.49            | 69.55            | 19.96            | 1.228                                                                                            | 1.38                                                                                          | 0.152                 |
| 14            | 10.48            | 59.6             | 29.92            | 1.369                                                                                            | 1.147                                                                                         | 0.222                 |
| 15            | 10.48            | 49.64            | 39.88            | 1.34                                                                                             | 1.375                                                                                         | 0.035                 |
| 16            | 51.32            | 38.91            | 9.77             | 1.217                                                                                            | 1.148                                                                                         | 0.069                 |
| 17            | 61.26            | 29.03            | 9.71             | 1.21                                                                                             | 1.23                                                                                          | 0.02                  |
| 18            | 71.09            | 19.25            | 9.66             | 1.279                                                                                            | 1.342                                                                                         | 0.063                 |
| 19            | 80.82            | 9.57             | 9.61             | 1.369                                                                                            | 1.396                                                                                         | 0.027                 |
| 20            | 71.06            | 9.62             | 19.32            | 1.479                                                                                            | 1.438                                                                                         | 0.041                 |
| 21            | 61.21            | 9.67             | 29.12            | 1.663                                                                                            | 1.437                                                                                         | 0.226                 |
| 22            | 51.26            | 9.72             | 39.02            | 1.667                                                                                            | 1.437                                                                                         | 0.23                  |
| 23            | 71.08            | 14.43            | 14.49            | 1.501                                                                                            | 1.396                                                                                         | 0.105                 |
| 24            | 61.24            | 19.34            | 19.42            | 1.435                                                                                            | 1.267                                                                                         | 0.168                 |
| 25            | 51.3             | 24.3             | 24.4             | 1.415                                                                                            | 1.252                                                                                         | 0.163                 |
| 26            | 41.25            | 29.32            | 29.43            | 1.412                                                                                            | 1.262                                                                                         | 0.15                  |
| 27            | 31.1             | 34.38            | 34.52            | 1.425                                                                                            | 1.268                                                                                         | 0.157                 |
| 28            | 20.84            | 39.5             | 39.66            | 1.528                                                                                            | 1.253                                                                                         | 0.275                 |
| 29            | 41.27            | 39.1             | 19.63            | 1.516                                                                                            | 1.171                                                                                         | 0.345                 |

|                           |       |       |       |       |       |       |
|---------------------------|-------|-------|-------|-------|-------|-------|
| 30                        | 36.19 | 34.29 | 29.52 | 1.41  | 1.272 | 0.138 |
| 31                        | 31.1  | 29.46 | 39.44 | 1.367 | 1.247 | 0.12  |
| 32                        | 25.97 | 24.61 | 49.42 | 1.346 | 1.299 | 0.047 |
| 33                        | 20.82 | 19.73 | 59.45 | 1.336 | 1.098 | 0.238 |
| 34                        | 15.65 | 14.83 | 69.52 | 1.375 | 1.111 | 0.264 |
| 35                        | 41.23 | 19.54 | 39.23 | 1.54  | 1.33  | 0.21  |
| 36                        | 36.18 | 29.39 | 34.43 | 1.391 | 1.254 | 0.137 |
| 37                        | 31.1  | 39.3  | 29.6  | 1.344 | 1.293 | 0.051 |
| 38                        | 25.99 | 49.27 | 24.74 | 1.358 | 1.27  | 0.088 |
| 39                        | 20.86 | 59.29 | 19.85 | 1.265 | 1.263 | 0.002 |
| 40                        | 15.69 | 69.38 | 14.93 | 1.258 | 1.239 | 0.019 |
| Mean Absolute Error (MAE) |       |       |       |       |       | 0.147 |

The ETR model was able to predict the  $\log_{10}\rho$  of 16 compositions within  $\pm 10\%$  deviation range compared to experimental values.

**Table S10.** Prediction, absolute error, and MAE of  $\log_{10}H_V$  by ETR model for 40 experimental compositions

| S. No. | Fe (at.%) | Co (at.%) | Ni (at.%) | Experimental $\log_{10}H_V$ ( $\log_{10}(\text{HV})$ ) | Predicted $\log_{10}H_V$ ( $\log_{10}(\text{HV})$ ) | Absolute error |
|--------|-----------|-----------|-----------|--------------------------------------------------------|-----------------------------------------------------|----------------|
| 1      | 10.47     | 39.7      | 49.83     | 2.134                                                  | 2.168                                               | 0.034          |
| 2      | 10.47     | 29.76     | 59.77     | 2.187                                                  | 2.205                                               | 0.018          |
| 3      | 10.47     | 19.83     | 69.7      | 2.193                                                  | 2.21                                                | 0.017          |
| 4      | 10.46     | 9.91      | 79.63     | 2.198                                                  | 2.294                                               | 0.096          |
| 5      | 20.82     | 9.86      | 69.32     | 2.25                                                   | 2.347                                               | 0.097          |
| 6      | 31.07     | 9.81      | 59.12     | 2.27                                                   | 2.269                                               | 0.001          |
| 7      | 41.22     | 9.76      | 49.02     | 2.318                                                  | 2.325                                               | 0.007          |
| 8      | 34.49     | 32.69     | 32.82     | 2.345                                                  | 2.519                                               | 0.174          |
| 9      | 41.28     | 48.9      | 9.82      | 2.432                                                  | 2.572                                               | 0.14           |
| 10     | 31.13     | 59        | 9.87      | 2.424                                                  | 2.466                                               | 0.042          |
| 11     | 20.87     | 69.2      | 9.93      | 2.239                                                  | 2.42                                                | 0.181          |
| 12     | 10.49     | 79.53     | 9.98      | 2.202                                                  | 2.324                                               | 0.122          |
| 13     | 10.49     | 69.55     | 19.96     | 2.189                                                  | 2.411                                               | 0.222          |

|                           |       |       |       |       |       |       |
|---------------------------|-------|-------|-------|-------|-------|-------|
| 14                        | 10.48 | 59.6  | 29.92 | 2.192 | 2.213 | 0.021 |
| 15                        | 10.48 | 49.64 | 39.88 | 2.238 | 2.411 | 0.173 |
| 16                        | 51.32 | 38.91 | 9.77  | 2.496 | 2.64  | 0.144 |
| 17                        | 61.26 | 29.03 | 9.71  | 2.444 | 2.556 | 0.112 |
| 18                        | 71.09 | 19.25 | 9.66  | 2.373 | 2.434 | 0.061 |
| 19                        | 80.82 | 9.57  | 9.61  | 2.335 | 2.496 | 0.161 |
| 20                        | 71.06 | 9.62  | 19.32 | 2.381 | 2.489 | 0.108 |
| 21                        | 61.21 | 9.67  | 29.12 | 2.439 | 2.469 | 0.03  |
| 22                        | 51.26 | 9.72  | 39.02 | 2.293 | 2.451 | 0.158 |
| 23                        | 71.08 | 14.43 | 14.49 | 2.548 | 2.461 | 0.087 |
| 24                        | 61.24 | 19.34 | 19.42 | 2.609 | 2.558 | 0.051 |
| 25                        | 51.3  | 24.3  | 24.4  | 2.417 | 2.592 | 0.175 |
| 26                        | 41.25 | 29.32 | 29.43 | 2.328 | 2.562 | 0.234 |
| 27                        | 31.1  | 34.38 | 34.52 | 2.344 | 2.485 | 0.141 |
| 28                        | 20.84 | 39.5  | 39.66 | 2.263 | 2.301 | 0.038 |
| 29                        | 41.27 | 39.1  | 19.63 | 2.364 | 2.597 | 0.233 |
| 30                        | 36.19 | 34.29 | 29.52 | 2.327 | 2.534 | 0.207 |
| 31                        | 31.1  | 29.46 | 39.44 | 2.358 | 2.461 | 0.103 |
| 32                        | 25.97 | 24.61 | 49.42 | 2.286 | 2.272 | 0.014 |
| 33                        | 20.82 | 19.73 | 59.45 | 2.321 | 2.161 | 0.16  |
| 34                        | 15.65 | 14.83 | 69.52 | 2.204 | 2.349 | 0.145 |
| 35                        | 41.23 | 19.54 | 39.23 | 2.316 | 2.476 | 0.16  |
| 36                        | 36.18 | 29.39 | 34.43 | 2.312 | 2.524 | 0.212 |
| 37                        | 31.1  | 39.3  | 29.6  | 2.303 | 2.491 | 0.188 |
| 38                        | 25.99 | 49.27 | 24.74 | 2.302 | 2.476 | 0.174 |
| 39                        | 20.86 | 59.29 | 19.85 | 2.242 | 2.431 | 0.189 |
| 40                        | 15.69 | 69.38 | 14.93 | 2.252 | 2.375 | 0.123 |
| Mean Absolute Error (MAE) |       |       |       |       |       | 0.119 |

The ETR model was able to predict the  $\log_{10}H_V$  of all 40 compositions within  $\pm 10\%$  deviation range compared to experimental values.

**Table S11.** Prediction, absolute error, and MAE of  $\log_{10}Cost$  by ETR model for 40 experimental compositions

| <b>S. No.</b> | <b>Fe (at.%)</b> | <b>Co (at.%)</b> | <b>Ni (at.%)</b> | <b>Experimental <math>\log_{10}Cost</math> (<math>\log_{10}(\\$/kg)</math>)</b> | <b>Predicted <math>\log_{10}Cost</math> (<math>\log_{10}(\\$/kg)</math>)</b> | <b>Absolute error</b> |
|---------------|------------------|------------------|------------------|---------------------------------------------------------------------------------|------------------------------------------------------------------------------|-----------------------|
| 1             | 10.47            | 39.7             | 49.83            | 1.303                                                                           | 1.307                                                                        | 0.004                 |
| 2             | 10.47            | 29.76            | 59.77            | 1.261                                                                           | 1.265                                                                        | 0.004                 |
| 3             | 10.47            | 19.83            | 69.7             | 1.213                                                                           | 1.205                                                                        | 0.008                 |
| 4             | 10.46            | 9.91             | 79.63            | 1.16                                                                            | 1.146                                                                        | 0.014                 |
| 5             | 20.82            | 9.86             | 69.32            | 1.117                                                                           | 1.107                                                                        | 0.01                  |
| 6             | 31.07            | 9.81             | 59.12            | 1.07                                                                            | 1.048                                                                        | 0.022                 |
| 7             | 41.22            | 9.76             | 49.02            | 1.017                                                                           | 1.001                                                                        | 0.016                 |
| 8             | 34.49            | 32.69            | 32.82            | 1.196                                                                           | 1.194                                                                        | 0.002                 |
| 9             | 41.28            | 48.9             | 9.82             | 1.254                                                                           | 1.254                                                                        | 0                     |
| 10            | 31.13            | 59               | 9.87             | 1.326                                                                           | 1.325                                                                        | 0.001                 |
| 11            | 20.87            | 69.2             | 9.93             | 1.388                                                                           | 1.388                                                                        | 0                     |
| 12            | 10.49            | 79.53            | 9.98             | 1.442                                                                           | 1.43                                                                         | 0.012                 |
| 13            | 10.49            | 69.55            | 19.96            | 1.411                                                                           | 1.413                                                                        | 0.002                 |
| 14            | 10.48            | 59.6             | 29.92            | 1.378                                                                           | 1.374                                                                        | 0.004                 |
| 15            | 10.48            | 49.64            | 39.88            | 1.342                                                                           | 1.342                                                                        | 0                     |
| 16            | 51.32            | 38.91            | 9.77             | 1.168                                                                           | 1.17                                                                         | 0.002                 |
| 17            | 61.26            | 29.03            | 9.71             | 1.06                                                                            | 1.073                                                                        | 0.013                 |
| 18            | 71.09            | 19.25            | 9.66             | 0.916                                                                           | 0.878                                                                        | 0.038                 |
| 19            | 80.82            | 9.57             | 9.61             | 0.7                                                                             | 0.6                                                                          | 0.1                   |
| 20            | 71.06            | 9.62             | 19.32            | 0.803                                                                           | 0.759                                                                        | 0.044                 |
| 21            | 61.21            | 9.67             | 29.12            | 0.887                                                                           | 0.825                                                                        | 0.062                 |
| 22            | 51.26            | 9.72             | 39.02            | 0.957                                                                           | 0.947                                                                        | 0.01                  |
| 23            | 71.08            | 14.43            | 14.49            | 0.863                                                                           | 0.798                                                                        | 0.065                 |
| 24            | 61.24            | 19.34            | 19.42            | 0.982                                                                           | 0.984                                                                        | 0.002                 |
| 25            | 51.3             | 24.3             | 24.4             | 1.075                                                                           | 1.077                                                                        | 0.002                 |
| 26            | 41.25            | 29.32            | 29.43            | 1.152                                                                           | 1.159                                                                        | 0.007                 |
| 27            | 31.1             | 34.38            | 34.52            | 1.217                                                                           | 1.207                                                                        | 0.01                  |
| 28            | 20.84            | 39.5             | 39.66            | 1.273                                                                           | 1.277                                                                        | 0.004                 |

|                           |       |       |       |       |       |       |
|---------------------------|-------|-------|-------|-------|-------|-------|
| 29                        | 41.27 | 39.1  | 19.63 | 1.206 | 1.204 | 0.002 |
| 30                        | 36.19 | 34.29 | 29.52 | 1.199 | 1.202 | 0.003 |
| 31                        | 31.1  | 29.46 | 39.44 | 1.191 | 1.181 | 0.01  |
| 32                        | 25.97 | 24.61 | 49.42 | 1.184 | 1.173 | 0.011 |
| 33                        | 20.82 | 19.73 | 59.45 | 1.176 | 1.174 | 0.002 |
| 34                        | 15.65 | 14.83 | 69.52 | 1.168 | 1.152 | 0.016 |
| 35                        | 41.23 | 19.54 | 39.23 | 1.09  | 1.113 | 0.023 |
| 36                        | 36.18 | 29.39 | 34.43 | 1.172 | 1.172 | 0     |
| 37                        | 31.1  | 39.3  | 29.6  | 1.241 | 1.242 | 0.001 |
| 38                        | 25.99 | 49.27 | 24.74 | 1.301 | 1.301 | 0     |
| 39                        | 20.86 | 59.29 | 19.85 | 1.353 | 1.355 | 0.002 |
| 40                        | 15.69 | 69.38 | 14.93 | 1.4   | 1.397 | 0.003 |
| Mean Absolute Error (MAE) |       |       |       |       |       | 0.013 |

The ETR model was able to predict the  $\log_{10}Cost$  of 39 compositions within  $\pm 10\%$  deviation range compared to experimental values.

**Table S12.** Prediction, absolute error, and MAE of  $M_s$  by NNR\_4layers\_Wen model for 40 experimental compositions

| S. No. | Fe (at.%) | Co (at.%) | Ni (at.%) | Experimental | Predicted | Absolute |
|--------|-----------|-----------|-----------|--------------|-----------|----------|
|        |           |           |           | $M_s$ (T)    | $M_s$ (T) | error    |
| 1      | 10.47     | 39.7      | 49.83     | 1.37         | 1.276     | 0.094    |
| 2      | 10.47     | 29.76     | 59.77     | 1.18         | 1.168     | 0.012    |
| 3      | 10.47     | 19.83     | 69.7      | 1.08         | 1.054     | 0.026    |
| 4      | 10.46     | 9.91      | 79.63     | 0.95         | 0.923     | 0.027    |
| 5      | 20.82     | 9.86      | 69.32     | 1.31         | 1.148     | 0.162    |
| 6      | 31.07     | 9.81      | 59.12     | 1.29         | 1.415     | 0.125    |
| 7      | 41.22     | 9.76      | 49.02     | 1.41         | 1.65      | 0.24     |
| 8      | 34.49     | 32.69     | 32.82     | 1.6          | 1.801     | 0.201    |
| 9      | 41.28     | 48.9      | 9.82      | 1.97         | 2.142     | 0.172    |
| 10     | 31.13     | 59        | 9.87      | 1.91         | 2.101     | 0.191    |
| 11     | 20.87     | 69.2      | 9.93      | 1.88         | 2.012     | 0.132    |
| 12     | 10.49     | 79.53     | 9.98      | 1.87         | 1.885     | 0.015    |

|                           |       |       |       |      |       |       |
|---------------------------|-------|-------|-------|------|-------|-------|
| 13                        | 10.49 | 69.55 | 19.96 | 1.69 | 1.703 | 0.013 |
| 14                        | 10.48 | 59.6  | 29.92 | 1.6  | 1.528 | 0.072 |
| 15                        | 10.48 | 49.64 | 39.88 | 1.5  | 1.39  | 0.11  |
| 16                        | 51.32 | 38.91 | 9.77  | 2.12 | 2.219 | 0.099 |
| 17                        | 61.26 | 29.03 | 9.71  | 2.09 | 2.228 | 0.138 |
| 18                        | 71.09 | 19.25 | 9.66  | 2.03 | 2.229 | 0.199 |
| 19                        | 80.82 | 9.57  | 9.61  | 1.92 | 2.278 | 0.358 |
| 20                        | 71.06 | 9.62  | 19.32 | 1.69 | 2.225 | 0.535 |
| 21                        | 61.21 | 9.67  | 29.12 | 1.43 | 2.102 | 0.672 |
| 22                        | 51.26 | 9.72  | 39.02 | 1.47 | 1.892 | 0.422 |
| 23                        | 71.08 | 14.43 | 14.49 | 2    | 2.228 | 0.228 |
| 24                        | 61.24 | 19.34 | 19.42 | 1.94 | 2.177 | 0.237 |
| 25                        | 51.3  | 24.3  | 24.4  | 1.83 | 2.101 | 0.271 |
| 26                        | 41.25 | 29.32 | 29.43 | 1.77 | 1.942 | 0.172 |
| 27                        | 31.1  | 34.38 | 34.52 | 1.65 | 1.731 | 0.081 |
| 28                        | 20.84 | 39.5  | 39.66 | 1.51 | 1.474 | 0.036 |
| 29                        | 41.27 | 39.1  | 19.63 | 1.8  | 2.007 | 0.207 |
| 30                        | 36.19 | 34.29 | 29.52 | 1.75 | 1.864 | 0.114 |
| 31                        | 31.1  | 29.46 | 39.44 | 1.58 | 1.663 | 0.083 |
| 32                        | 25.97 | 24.61 | 49.42 | 1.44 | 1.457 | 0.017 |
| 33                        | 20.82 | 19.73 | 59.45 | 1.35 | 1.238 | 0.112 |
| 34                        | 15.65 | 14.83 | 69.52 | 1.17 | 1.081 | 0.089 |
| 35                        | 41.23 | 19.54 | 39.23 | 1.64 | 1.791 | 0.151 |
| 36                        | 36.18 | 29.39 | 34.43 | 1.71 | 1.8   | 0.09  |
| 37                        | 31.1  | 39.3  | 29.6  | 1.71 | 1.782 | 0.072 |
| 38                        | 25.99 | 49.27 | 24.74 | 1.73 | 1.748 | 0.018 |
| 39                        | 20.86 | 59.29 | 19.85 | 1.73 | 1.793 | 0.063 |
| 40                        | 15.69 | 69.38 | 14.93 | 1.76 | 1.85  | 0.09  |
| Mean Absolute Error (MAE) |       |       |       |      |       | 0.154 |

The NNR\_4layers\_Wen model was able to predict the  $M_s$  of 29 compositions within  $\pm 10\%$  deviation range compared to experimental values.



**Table S13.** Prediction, absolute error, and MAE of  $\log_{10}H_c$  by NNR\_4layers\_Wen model for 40 experimental compositions

| S. No. | Fe<br>(at.%) | Co<br>(at.%) | Ni<br>(at.%) | Experimental<br>$\log_{10}H_c$ ( $\log_{10}(\text{A/m})$ ) | Predicted $\log_{10}H_c$<br>( $\log_{10}(\text{A/m})$ ) | Absolute<br>error |
|--------|--------------|--------------|--------------|------------------------------------------------------------|---------------------------------------------------------|-------------------|
| 1      | 10.47        | 39.7         | 49.83        | 3.144                                                      | 2.656                                                   | 0.488             |
| 2      | 10.47        | 29.76        | 59.77        | 2.98                                                       | 2.426                                                   | 0.554             |
| 3      | 10.47        | 19.83        | 69.7         | 2.961                                                      | 2.17                                                    | 0.791             |
| 4      | 10.46        | 9.91         | 79.63        | 2.874                                                      | 1.826                                                   | 1.048             |
| 5      | 20.82        | 9.86         | 69.32        | 2.591                                                      | 1.74                                                    | 0.851             |
| 6      | 31.07        | 9.81         | 59.12        | 2.679                                                      | 1.466                                                   | 1.213             |
| 7      | 41.22        | 9.76         | 49.02        | 2.223                                                      | 1.459                                                   | 0.764             |
| 8      | 34.49        | 32.69        | 32.82        | 2.793                                                      | 2.521                                                   | 0.272             |
| 9      | 41.28        | 48.9         | 9.82         | 3.062                                                      | 3.285                                                   | 0.223             |
| 10     | 31.13        | 59           | 9.87         | 2.758                                                      | 3.237                                                   | 0.479             |
| 11     | 20.87        | 69.2         | 9.93         | 2.7                                                        | 3.125                                                   | 0.425             |
| 12     | 10.49        | 79.53        | 9.98         | 2.835                                                      | 2.962                                                   | 0.127             |
| 13     | 10.49        | 69.55        | 19.96        | 3.001                                                      | 2.959                                                   | 0.042             |
| 14     | 10.48        | 59.6         | 29.92        | 2.845                                                      | 2.927                                                   | 0.082             |
| 15     | 10.48        | 49.64        | 39.88        | 2.85                                                       | 2.88                                                    | 0.03              |
| 16     | 51.32        | 38.91        | 9.77         | 3.053                                                      | 3.189                                                   | 0.136             |
| 17     | 61.26        | 29.03        | 9.71         | 3.053                                                      | 3.029                                                   | 0.024             |
| 18     | 71.09        | 19.25        | 9.66         | 2.973                                                      | 2.919                                                   | 0.054             |
| 19     | 80.82        | 9.57         | 9.61         | 3.091                                                      | 2.829                                                   | 0.262             |
| 20     | 71.06        | 9.62         | 19.32        | 3.166                                                      | 2.597                                                   | 0.569             |
| 21     | 61.21        | 9.67         | 29.12        | 3.062                                                      | 2.084                                                   | 0.978             |
| 22     | 51.26        | 9.72         | 39.02        | 2.85                                                       | 1.684                                                   | 1.166             |
| 23     | 71.08        | 14.43        | 14.49        | 3.322                                                      | 2.796                                                   | 0.526             |
| 24     | 61.24        | 19.34        | 19.42        | 3.182                                                      | 2.724                                                   | 0.458             |
| 25     | 51.3         | 24.3         | 24.4         | 2.942                                                      | 2.73                                                    | 0.212             |
| 26     | 41.25        | 29.32        | 29.43        | 2.554                                                      | 2.631                                                   | 0.077             |
| 27     | 31.1         | 34.38        | 34.52        | 2.457                                                      | 2.487                                                   | 0.03              |
| 28     | 20.84        | 39.5         | 39.66        | 2.564                                                      | 2.64                                                    | 0.076             |
| 29     | 41.27        | 39.1         | 19.63        | 2.922                                                      | 3.243                                                   | 0.321             |

|                           |       |       |       |       |       |       |
|---------------------------|-------|-------|-------|-------|-------|-------|
| 30                        | 36.19 | 34.29 | 29.52 | 2.573 | 2.708 | 0.135 |
| 31                        | 31.1  | 29.46 | 39.44 | 2.625 | 2.233 | 0.392 |
| 32                        | 25.97 | 24.61 | 49.42 | 2.608 | 2.014 | 0.594 |
| 33                        | 20.82 | 19.73 | 59.45 | 2.672 | 2     | 0.672 |
| 34                        | 15.65 | 14.83 | 69.52 | 2.83  | 1.993 | 0.837 |
| 35                        | 41.23 | 19.54 | 39.23 | 2.686 | 1.963 | 0.723 |
| 36                        | 36.18 | 29.39 | 34.43 | 2.625 | 2.382 | 0.243 |
| 37                        | 31.1  | 39.3  | 29.6  | 2.686 | 2.739 | 0.053 |
| 38                        | 25.99 | 49.27 | 24.74 | 2.657 | 2.984 | 0.327 |
| 39                        | 20.86 | 59.29 | 19.85 | 2.617 | 3.086 | 0.469 |
| 40                        | 15.69 | 69.38 | 14.93 | 2.733 | 3.063 | 0.33  |
| Mean Absolute Error (MAE) |       |       |       |       |       | 0.426 |

The NNR\_4layers\_Wen model was able to predict the  $\log_{10}H_c$  of 16 compositions within  $\pm 10\%$  deviation range compared to experimental values.

**Table S14.** Prediction, absolute error, and MAE of  $\log_{10}T_c$  by NNR\_4layers\_Wen model for 40 experimental compositions

| S. No. | Fe<br>(at.%) | Co<br>(at.%) | Ni<br>(at.%) | Experimental $\log_{10}T_c$<br>( $\log_{10}(\text{K})$ ) | Predicted $\log_{10}T_c$<br>( $\log_{10}(\text{K})$ ) | Absolute<br>error |
|--------|--------------|--------------|--------------|----------------------------------------------------------|-------------------------------------------------------|-------------------|
| 1      | 10.47        | 39.7         | 49.83        | 3.032                                                    | 3.045                                                 | 0.013             |
| 2      | 10.47        | 29.76        | 59.77        | 3.005                                                    | 3.018                                                 | 0.013             |
| 3      | 10.47        | 19.83        | 69.7         | 2.971                                                    | 2.984                                                 | 0.013             |
| 4      | 10.46        | 9.91         | 79.63        | 2.948                                                    | 2.94                                                  | 0.008             |
| 5      | 20.82        | 9.86         | 69.32        | 2.954                                                    | 2.957                                                 | 0.003             |
| 6      | 31.07        | 9.81         | 59.12        | 2.945                                                    | 2.941                                                 | 0.004             |
| 7      | 41.22        | 9.76         | 49.02        | 2.951                                                    | 2.922                                                 | 0.029             |
| 8      | 34.49        | 32.69        | 32.82        | 3.009                                                    | 2.992                                                 | 0.017             |
| 9      | 41.28        | 48.9         | 9.82         | 3.063                                                    | 3.049                                                 | 0.014             |
| 10     | 31.13        | 59           | 9.87         | 3.066                                                    | 3.066                                                 | 0                 |
| 11     | 20.87        | 69.2         | 9.93         | 3.103                                                    | 3.11                                                  | 0.007             |
| 12     | 10.49        | 79.53        | 9.98         | 3.11                                                     | 3.124                                                 | 0.014             |
| 13     | 10.49        | 69.55        | 19.96        | 3.09                                                     | 3.105                                                 | 0.015             |

|                           |       |       |       |       |       |       |
|---------------------------|-------|-------|-------|-------|-------|-------|
| 14                        | 10.48 | 59.6  | 29.92 | 3.077 | 3.087 | 0.01  |
| 15                        | 10.48 | 49.64 | 39.88 | 3.06  | 3.069 | 0.009 |
| 16                        | 51.32 | 38.91 | 9.77  | 3.069 | 3.046 | 0.023 |
| 17                        | 61.26 | 29.03 | 9.71  | 3.064 | 3.035 | 0.029 |
| 18                        | 71.09 | 19.25 | 9.66  | 3.068 | 3.013 | 0.055 |
| 19                        | 80.82 | 9.57  | 9.61  | 3.018 | 3.015 | 0.003 |
| 20                        | 71.06 | 9.62  | 19.32 | 2.998 | 2.958 | 0.04  |
| 21                        | 61.21 | 9.67  | 29.12 | 2.943 | 2.903 | 0.04  |
| 22                        | 51.26 | 9.72  | 39.02 | 2.94  | 2.91  | 0.03  |
| 23                        | 71.08 | 14.43 | 14.49 | 3.007 | 2.987 | 0.02  |
| 24                        | 61.24 | 19.34 | 19.42 | 3     | 2.977 | 0.023 |
| 25                        | 51.3  | 24.3  | 24.4  | 3.015 | 2.984 | 0.031 |
| 26                        | 41.25 | 29.32 | 29.43 | 3.006 | 2.984 | 0.022 |
| 27                        | 31.1  | 34.38 | 34.52 | 3.037 | 2.998 | 0.039 |
| 28                        | 20.84 | 39.5  | 39.66 | 3.037 | 3.026 | 0.011 |
| 29                        | 41.27 | 39.1  | 19.63 | 3.024 | 3.011 | 0.013 |
| 30                        | 36.19 | 34.29 | 29.52 | 3.003 | 2.995 | 0.008 |
| 31                        | 31.1  | 29.46 | 39.44 | 3.01  | 2.984 | 0.026 |
| 32                        | 25.97 | 24.61 | 49.42 | 3.001 | 2.974 | 0.027 |
| 33                        | 20.82 | 19.73 | 59.45 | 2.988 | 2.98  | 0.008 |
| 34                        | 15.65 | 14.83 | 69.52 | 2.96  | 2.969 | 0.009 |
| 35                        | 41.23 | 19.54 | 39.23 | 2.975 | 2.946 | 0.029 |
| 36                        | 36.18 | 29.39 | 34.43 | 3.024 | 2.982 | 0.042 |
| 37                        | 31.1  | 39.3  | 29.6  | 3.028 | 3.006 | 0.022 |
| 38                        | 25.99 | 49.27 | 24.74 | 3.064 | 3.042 | 0.022 |
| 39                        | 20.86 | 59.29 | 19.85 | 3.064 | 3.085 | 0.021 |
| 40                        | 15.69 | 69.38 | 14.93 | 3.088 | 3.107 | 0.019 |
| Mean Absolute Error (MAE) |       |       |       |       |       | 0.02  |

The NNR\_4layers\_Wen model was able to predict the  $\log_{10}T_c$  of all 40 compositions within  $\pm 10\%$  deviation range compared to experimental values.

**Table S15.** Prediction, absolute error, and MAE of  $\log_{10} \rho$  by NNR\_4layers\_Wen model for 40 experimental compositions

| S. No. | Fe<br>(at.%) | Co<br>(at.%) | Ni<br>(at.%) | Experimental $\log_{10}\rho$<br>( $\log_{10}(\mu\Omega\cdot\text{cm})$ ) | Predicted $\log_{10}\rho$<br>( $\log_{10}(\mu\Omega\cdot\text{cm})$ ) | Absolute<br>error |
|--------|--------------|--------------|--------------|--------------------------------------------------------------------------|-----------------------------------------------------------------------|-------------------|
| 1      | 10.47        | 39.7         | 49.83        | 1.422                                                                    | 1.256                                                                 | 0.166             |
| 2      | 10.47        | 29.76        | 59.77        | 1.31                                                                     | 1.213                                                                 | 0.097             |
| 3      | 10.47        | 19.83        | 69.7         | 1.292                                                                    | 1.188                                                                 | 0.104             |
| 4      | 10.46        | 9.91         | 79.63        | 1.281                                                                    | 1.174                                                                 | 0.107             |
| 5      | 20.82        | 9.86         | 69.32        | 1.352                                                                    | 1.186                                                                 | 0.166             |
| 6      | 31.07        | 9.81         | 59.12        | 1.423                                                                    | 1.248                                                                 | 0.175             |
| 7      | 41.22        | 9.76         | 49.02        | 1.589                                                                    | 1.346                                                                 | 0.243             |
| 8      | 34.49        | 32.69        | 32.82        | 1.423                                                                    | 1.226                                                                 | 0.197             |
| 9      | 41.28        | 48.9         | 9.82         | 1.246                                                                    | 1.035                                                                 | 0.211             |
| 10     | 31.13        | 59           | 9.87         | 1.193                                                                    | 1.077                                                                 | 0.116             |
| 11     | 20.87        | 69.2         | 9.93         | 1.188                                                                    | 1.176                                                                 | 0.012             |
| 12     | 10.49        | 79.53        | 9.98         | 1.196                                                                    | 1.215                                                                 | 0.019             |
| 13     | 10.49        | 69.55        | 19.96        | 1.228                                                                    | 1.291                                                                 | 0.063             |
| 14     | 10.48        | 59.6         | 29.92        | 1.369                                                                    | 1.319                                                                 | 0.05              |
| 15     | 10.48        | 49.64        | 39.88        | 1.34                                                                     | 1.306                                                                 | 0.034             |
| 16     | 51.32        | 38.91        | 9.77         | 1.217                                                                    | 1.049                                                                 | 0.168             |
| 17     | 61.26        | 29.03        | 9.71         | 1.21                                                                     | 1.151                                                                 | 0.059             |
| 18     | 71.09        | 19.25        | 9.66         | 1.279                                                                    | 1.29                                                                  | 0.011             |
| 19     | 80.82        | 9.57         | 9.61         | 1.369                                                                    | 1.427                                                                 | 0.058             |
| 20     | 71.06        | 9.62         | 19.32        | 1.479                                                                    | 1.412                                                                 | 0.067             |
| 21     | 61.21        | 9.67         | 29.12        | 1.663                                                                    | 1.402                                                                 | 0.261             |
| 22     | 51.26        | 9.72         | 39.02        | 1.667                                                                    | 1.386                                                                 | 0.281             |
| 23     | 71.08        | 14.43        | 14.49        | 1.501                                                                    | 1.362                                                                 | 0.139             |
| 24     | 61.24        | 19.34        | 19.42        | 1.435                                                                    | 1.269                                                                 | 0.166             |
| 25     | 51.3         | 24.3         | 24.4         | 1.415                                                                    | 1.244                                                                 | 0.171             |
| 26     | 41.25        | 29.32        | 29.43        | 1.412                                                                    | 1.246                                                                 | 0.166             |
| 27     | 31.1         | 34.38        | 34.52        | 1.425                                                                    | 1.229                                                                 | 0.196             |
| 28     | 20.84        | 39.5         | 39.66        | 1.528                                                                    | 1.26                                                                  | 0.268             |
| 29     | 41.27        | 39.1         | 19.63        | 1.516                                                                    | 1.165                                                                 | 0.351             |

|                           |       |       |       |       |       |       |
|---------------------------|-------|-------|-------|-------|-------|-------|
| 30                        | 36.19 | 34.29 | 29.52 | 1.41  | 1.222 | 0.188 |
| 31                        | 31.1  | 29.46 | 39.44 | 1.367 | 1.235 | 0.132 |
| 32                        | 25.97 | 24.61 | 49.42 | 1.346 | 1.231 | 0.115 |
| 33                        | 20.82 | 19.73 | 59.45 | 1.336 | 1.194 | 0.142 |
| 34                        | 15.65 | 14.83 | 69.52 | 1.375 | 1.192 | 0.183 |
| 35                        | 41.23 | 19.54 | 39.23 | 1.54  | 1.312 | 0.228 |
| 36                        | 36.18 | 29.39 | 34.43 | 1.391 | 1.241 | 0.15  |
| 37                        | 31.1  | 39.3  | 29.6  | 1.344 | 1.225 | 0.119 |
| 38                        | 25.99 | 49.27 | 24.74 | 1.358 | 1.223 | 0.135 |
| 39                        | 20.86 | 59.29 | 19.85 | 1.265 | 1.242 | 0.023 |
| 40                        | 15.69 | 69.38 | 14.93 | 1.258 | 1.251 | 0.007 |
| Mean Absolute Error (MAE) |       |       |       |       |       | 0.139 |

The NNR\_4layers\_Wen model was able to predict the  $\log_{10}\rho$  of 16 compositions within  $\pm 10\%$  deviation range compared to experimental values.

**Table S16.** Prediction, absolute error, and MAE of  $\log_{10}H_V$  by NNR\_4layers\_Wen model for 40 experimental compositions

| S. No. | Fe<br>(at.%) | Co<br>(at.%) | Ni<br>(at.%) | Experimental<br>$\log_{10}H_V$ ( $\log_{10}(\text{HV})$ ) | Predicted $\log_{10}H_V$<br>( $\log_{10}(\text{HV})$ ) | Absolute<br>error |
|--------|--------------|--------------|--------------|-----------------------------------------------------------|--------------------------------------------------------|-------------------|
| 1      | 10.47        | 39.7         | 49.83        | 2.134                                                     | 2.377                                                  | 0.243             |
| 2      | 10.47        | 29.76        | 59.77        | 2.187                                                     | 2.359                                                  | 0.172             |
| 3      | 10.47        | 19.83        | 69.7         | 2.193                                                     | 2.337                                                  | 0.144             |
| 4      | 10.46        | 9.91         | 79.63        | 2.198                                                     | 2.318                                                  | 0.12              |
| 5      | 20.82        | 9.86         | 69.32        | 2.25                                                      | 2.311                                                  | 0.061             |
| 6      | 31.07        | 9.81         | 59.12        | 2.27                                                      | 2.315                                                  | 0.045             |
| 7      | 41.22        | 9.76         | 49.02        | 2.318                                                     | 2.363                                                  | 0.045             |
| 8      | 34.49        | 32.69        | 32.82        | 2.345                                                     | 2.503                                                  | 0.158             |
| 9      | 41.28        | 48.9         | 9.82         | 2.432                                                     | 2.58                                                   | 0.148             |
| 10     | 31.13        | 59           | 9.87         | 2.424                                                     | 2.477                                                  | 0.053             |
| 11     | 20.87        | 69.2         | 9.93         | 2.239                                                     | 2.395                                                  | 0.156             |
| 12     | 10.49        | 79.53        | 9.98         | 2.202                                                     | 2.369                                                  | 0.167             |
| 13     | 10.49        | 69.55        | 19.96        | 2.189                                                     | 2.381                                                  | 0.192             |

|                           |       |       |       |       |       |       |
|---------------------------|-------|-------|-------|-------|-------|-------|
| 14                        | 10.48 | 59.6  | 29.92 | 2.192 | 2.372 | 0.18  |
| 15                        | 10.48 | 49.64 | 39.88 | 2.238 | 2.386 | 0.148 |
| 16                        | 51.32 | 38.91 | 9.77  | 2.496 | 2.632 | 0.136 |
| 17                        | 61.26 | 29.03 | 9.71  | 2.444 | 2.64  | 0.196 |
| 18                        | 71.09 | 19.25 | 9.66  | 2.373 | 2.61  | 0.237 |
| 19                        | 80.82 | 9.57  | 9.61  | 2.335 | 2.505 | 0.17  |
| 20                        | 71.06 | 9.62  | 19.32 | 2.381 | 2.558 | 0.177 |
| 21                        | 61.21 | 9.67  | 29.12 | 2.439 | 2.544 | 0.105 |
| 22                        | 51.26 | 9.72  | 39.02 | 2.293 | 2.447 | 0.154 |
| 23                        | 71.08 | 14.43 | 14.49 | 2.548 | 2.59  | 0.042 |
| 24                        | 61.24 | 19.34 | 19.42 | 2.609 | 2.622 | 0.013 |
| 25                        | 51.3  | 24.3  | 24.4  | 2.417 | 2.594 | 0.177 |
| 26                        | 41.25 | 29.32 | 29.43 | 2.328 | 2.543 | 0.215 |
| 27                        | 31.1  | 34.38 | 34.52 | 2.344 | 2.479 | 0.135 |
| 28                        | 20.84 | 39.5  | 39.66 | 2.263 | 2.413 | 0.15  |
| 29                        | 41.27 | 39.1  | 19.63 | 2.364 | 2.614 | 0.25  |
| 30                        | 36.19 | 34.29 | 29.52 | 2.327 | 2.534 | 0.207 |
| 31                        | 31.1  | 29.46 | 39.44 | 2.358 | 2.44  | 0.082 |
| 32                        | 25.97 | 24.61 | 49.42 | 2.286 | 2.375 | 0.089 |
| 33                        | 20.82 | 19.73 | 59.45 | 2.321 | 2.339 | 0.018 |
| 34                        | 15.65 | 14.83 | 69.52 | 2.204 | 2.325 | 0.121 |
| 35                        | 41.23 | 19.54 | 39.23 | 2.316 | 2.447 | 0.131 |
| 36                        | 36.18 | 29.39 | 34.43 | 2.312 | 2.491 | 0.179 |
| 37                        | 31.1  | 39.3  | 29.6  | 2.303 | 2.514 | 0.211 |
| 38                        | 25.99 | 49.27 | 24.74 | 2.302 | 2.476 | 0.174 |
| 39                        | 20.86 | 59.29 | 19.85 | 2.242 | 2.409 | 0.167 |
| 40                        | 15.69 | 69.38 | 14.93 | 2.252 | 2.382 | 0.13  |
| Mean Absolute Error (MAE) |       |       |       |       |       | 0.142 |

The NNR\_4layers\_Wen model was able to predict the  $\log_{10}HV$  of 39 compositions within  $\pm 10\%$  deviation range compared to experimental values.

**Table S17.** Prediction, absolute error, and MAE of  $\log_{10}Cost$  by NNR\_4layers\_Wen model for 40 experimental compositions

| S. No. | Fe<br>(at.%) | Co<br>(at.%) | Ni<br>(at.%) | Experimental<br>$\log_{10}Cost$ ( $\log_{10}(\$/kg)$ ) | Predicted<br>$\log_{10}Cost$<br>( $\log_{10}(\$/kg)$ ) | Absolute<br>error |
|--------|--------------|--------------|--------------|--------------------------------------------------------|--------------------------------------------------------|-------------------|
| 1      | 10.47        | 39.7         | 49.83        | 1.303                                                  | 1.286                                                  | 0.017             |
| 2      | 10.47        | 29.76        | 59.77        | 1.261                                                  | 1.24                                                   | 0.021             |
| 3      | 10.47        | 19.83        | 69.7         | 1.213                                                  | 1.195                                                  | 0.018             |
| 4      | 10.46        | 9.91         | 79.63        | 1.16                                                   | 1.159                                                  | 0.001             |
| 5      | 20.82        | 9.86         | 69.32        | 1.117                                                  | 1.125                                                  | 0.008             |
| 6      | 31.07        | 9.81         | 59.12        | 1.07                                                   | 1.06                                                   | 0.01              |
| 7      | 41.22        | 9.76         | 49.02        | 1.017                                                  | 1.017                                                  | 0                 |
| 8      | 34.49        | 32.69        | 32.82        | 1.196                                                  | 1.186                                                  | 0.01              |
| 9      | 41.28        | 48.9         | 9.82         | 1.254                                                  | 1.242                                                  | 0.012             |
| 10     | 31.13        | 59           | 9.87         | 1.326                                                  | 1.337                                                  | 0.011             |
| 11     | 20.87        | 69.2         | 9.93         | 1.388                                                  | 1.386                                                  | 0.002             |
| 12     | 10.49        | 79.53        | 9.98         | 1.442                                                  | 1.432                                                  | 0.01              |
| 13     | 10.49        | 69.55        | 19.96        | 1.411                                                  | 1.417                                                  | 0.006             |
| 14     | 10.48        | 59.6         | 29.92        | 1.378                                                  | 1.386                                                  | 0.008             |
| 15     | 10.48        | 49.64        | 39.88        | 1.342                                                  | 1.347                                                  | 0.005             |
| 16     | 51.32        | 38.91        | 9.77         | 1.168                                                  | 1.161                                                  | 0.007             |
| 17     | 61.26        | 29.03        | 9.71         | 1.06                                                   | 1.053                                                  | 0.007             |
| 18     | 71.09        | 19.25        | 9.66         | 0.916                                                  | 0.909                                                  | 0.007             |
| 19     | 80.82        | 9.57         | 9.61         | 0.7                                                    | 0.793                                                  | 0.093             |
| 20     | 71.06        | 9.62         | 19.32        | 0.803                                                  | 0.834                                                  | 0.031             |
| 21     | 61.21        | 9.67         | 29.12        | 0.887                                                  | 0.896                                                  | 0.009             |
| 22     | 51.26        | 9.72         | 39.02        | 0.957                                                  | 0.966                                                  | 0.009             |
| 23     | 71.08        | 14.43        | 14.49        | 0.863                                                  | 0.883                                                  | 0.02              |
| 24     | 61.24        | 19.34        | 19.42        | 0.982                                                  | 0.996                                                  | 0.014             |
| 25     | 51.3         | 24.3         | 24.4         | 1.075                                                  | 1.066                                                  | 0.009             |
| 26     | 41.25        | 29.32        | 29.43        | 1.152                                                  | 1.144                                                  | 0.008             |
| 27     | 31.1         | 34.38        | 34.52        | 1.217                                                  | 1.206                                                  | 0.011             |
| 28     | 20.84        | 39.5         | 39.66        | 1.273                                                  | 1.29                                                   | 0.017             |

|                           |       |       |       |       |       |       |
|---------------------------|-------|-------|-------|-------|-------|-------|
| 29                        | 41.27 | 39.1  | 19.63 | 1.206 | 1.208 | 0.002 |
| 30                        | 36.19 | 34.29 | 29.52 | 1.199 | 1.194 | 0.005 |
| 31                        | 31.1  | 29.46 | 39.44 | 1.191 | 1.178 | 0.013 |
| 32                        | 25.97 | 24.61 | 49.42 | 1.184 | 1.176 | 0.008 |
| 33                        | 20.82 | 19.73 | 59.45 | 1.176 | 1.178 | 0.002 |
| 34                        | 15.65 | 14.83 | 69.52 | 1.168 | 1.177 | 0.009 |
| 35                        | 41.23 | 19.54 | 39.23 | 1.09  | 1.093 | 0.003 |
| 36                        | 36.18 | 29.39 | 34.43 | 1.172 | 1.167 | 0.005 |
| 37                        | 31.1  | 39.3  | 29.6  | 1.241 | 1.241 | 0     |
| 38                        | 25.99 | 49.27 | 24.74 | 1.301 | 1.308 | 0.007 |
| 39                        | 20.86 | 59.29 | 19.85 | 1.353 | 1.352 | 0.001 |
| 40                        | 15.69 | 69.38 | 14.93 | 1.4   | 1.407 | 0.007 |
| Mean Absolute Error (MAE) |       |       |       |       |       | 0.011 |

The NNR\_4layers\_Wen model was able to predict the  $\log_{10}Cost$  of 39 compositions within  $\pm 10\%$  deviation range compared to experimental values.

## S5. Inverse Design Strategy

### S5.1. Acquisition Function

As mentioned in **Section 2.4**, negative expected improvement was used as acquisition function in *gp\_minimize*. Expected Improvement (*EI*) is defined as <sup>4,5</sup>:

$$EI(x) = \mathbb{E} \max(f(x) - f(x^+), 0) \quad (1)$$

where  $f(x^+)$  is the best function value till that point and  $x^+$  is the location of that function value which is described as:

$$x^+ = \underset{x_i \in x_{1:n}}{\operatorname{argmax}} f(x_i) \quad (2)$$

The EI can be evaluated analytically by using a GP model through the following equation <sup>6,7</sup>:

$$EI(x) = \begin{cases} (\mu(x) - f(x^+))\Phi(Z) + \sigma(x)\phi(Z) & \text{if } \sigma(x) > 0 \\ 0 & \text{if } \sigma(x) = 0 \end{cases} \quad (3)$$

$$Z = \frac{\mu(x) - f(x^+)}{\sigma(x)}$$



where  $\mu(x)$  and  $\sigma(x)$  are the mean and standard deviation of GP posterior distribution at  $x$ , respectively;  $\Phi$  and  $\phi$  denote the cumulative density function and probability density function, respectively.  $EI$  finds the global maximum of the objective function; thus, the negative expected improvement finds the global minimum.

### S5.2. Evolution of Acquisition function value for ETR model

The evolution of acquisition function value for the ETR model for each target sets of BO is shown in the figure below.

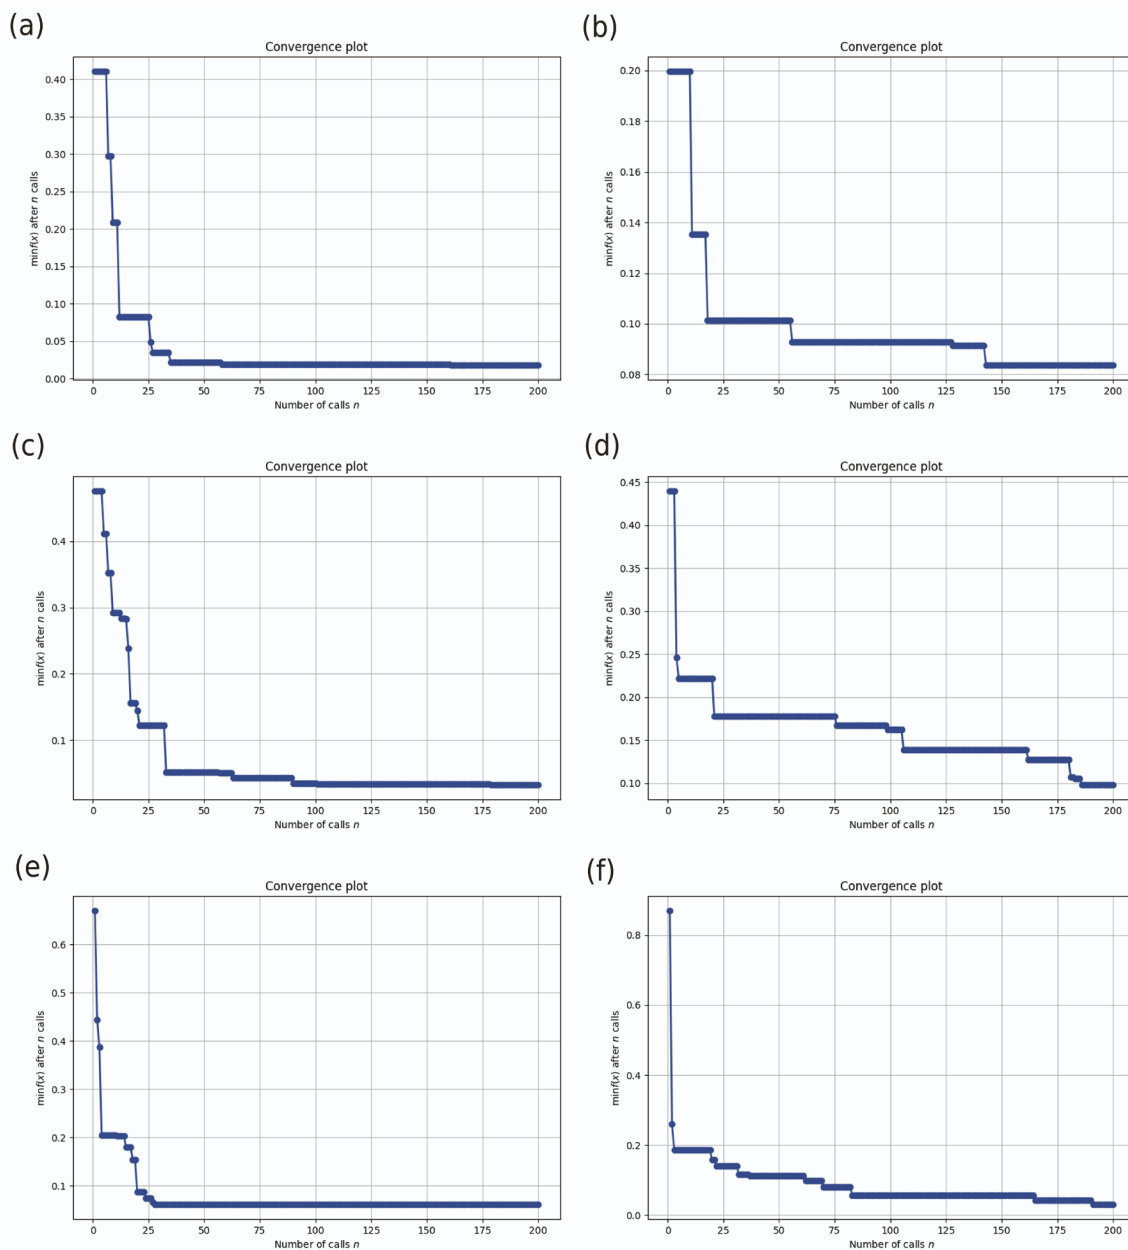

**Figure S6.** Evolution of acquisition function value of BO using the ETR model in the objective function for (a) target set 1, (b) target set 2, (c) target set 3, (d) target set 4, (e) target set 5, and (f) target set 6 of properties value.

### S5.3. Predictions and Experimental Validation

The set target values for BO and the respective predicted composition with lowest objective value of BO by using ETR and NNR\_4layers\_Wen models are tabulated in **Table S18** below.

**Table S18.** Set targets for BO and the respective predicted composition for the MPR model

| BO Set No. | Target $M_s$ (T) | Target $T_c$ (K) | Target Cost (\$/kg) | MPR Model       | Predicted Alloy Composition                              |
|------------|------------------|------------------|---------------------|-----------------|----------------------------------------------------------|
| 1          | 1.5              | 970              | 15                  | ETR             | Fe <sub>27.3</sub> Co <sub>25</sub> Ni <sub>47.7</sub>   |
|            |                  |                  |                     | NNR_4layers_Wen | Fe <sub>26.9</sub> Co <sub>26.3</sub> Ni <sub>46.8</sub> |
| 2          | 1.75             | 1000             | 11.5                | ETR             | Fe <sub>44.7</sub> Co <sub>15.4</sub> Ni <sub>39.9</sub> |
|            |                  |                  |                     | NNR_4layers_Wen | Fe <sub>41.7</sub> Co <sub>15.9</sub> Ni <sub>42.4</sub> |
| 3          | 1.75             | 1143             | 19                  | ETR             | Fe <sub>23.5</sub> Co <sub>40.8</sub> Ni <sub>35.7</sub> |
|            |                  |                  |                     | NNR_4layers_Wen | Fe <sub>26.9</sub> Co <sub>47.8</sub> Ni <sub>25.3</sub> |
| 4          | 2                | 1070             | 10.5                | ETR             | Fe <sub>50</sub> Co <sub>20.8</sub> Ni <sub>29.2</sub>   |
|            |                  |                  |                     | NNR_4layers_Wen | Fe <sub>46.4</sub> Co <sub>25.2</sub> Ni <sub>28.4</sub> |
| 5          | 2.2              | 1173             | 10                  | ETR             | Fe <sub>61.9</sub> Co <sub>22.8</sub> Ni <sub>15.3</sub> |
|            |                  |                  |                     | NNR_4layers_Wen | Fe <sub>61.5</sub> Co <sub>18.9</sub> Ni <sub>19.6</sub> |
| 6          | 2.4              | 1173             | 10                  | ETR             | Fe <sub>66.8</sub> Co <sub>28</sub> Ni <sub>5.2</sub>    |
|            |                  |                  |                     | NNR_4layers_Wen | Fe <sub>65.1</sub> Co <sub>32.4</sub> Ni <sub>2.5</sub>  |

These compositions were used in their respective models to predict the properties and then compared with the approximate experimental values determined from the interactive contour plots. Using the predicted and experimental values, deviation percentage was calculated as per the following formula:

$$Deviation \% = \frac{Predicted - Actual}{Predicted} \times 100$$

The predicted values, approximate experimental values, and deviation percentages for  $M_s$ ,  $T_c$ ,  $Cost$ ,  $H_c$ ,  $\rho$ , and  $H_V$  for BO sets 1 – 5 using ETR model are tabulated in **Table S25**, **Table**

**S26, Table S27, Table S28, Table S29, and Table S30**, respectively. Similarly, the predicted values, approximate experimental values, and deviation percentages for  $M_s$ ,  $T_c$ ,  $Cost$ ,  $H_c$ ,  $\rho$ , and  $H_V$  for BO sets 1 – 5 using NNR\_4layers\_Wen model are tabulated in **Table S25, Table S26, Table S27, Table S28, Table S29, and Table S30**, respectively.

**Table S19.** Deviation of  $M_s$  for the predicted composition for the first 5 BO sets using ETR model

| <b>BO Set</b>         | <b>Composition</b>                                       | <b>Predicted<br/><math>M_s</math> (T)</b> | <b>Approx.<br/>experimental <math>M_s</math> (T)</b> | <b>Deviation (%)</b> |
|-----------------------|----------------------------------------------------------|-------------------------------------------|------------------------------------------------------|----------------------|
| 1                     | Fe <sub>27.3</sub> Co <sub>25</sub> Ni <sub>47.7</sub>   | 1.5                                       | 1.47                                                 | 2                    |
| 2                     | Fe <sub>44.7</sub> Co <sub>15.4</sub> Ni <sub>39.9</sub> | 1.74                                      | 1.58                                                 | 9.2                  |
| 3                     | Fe <sub>23.5</sub> Co <sub>40.8</sub> Ni <sub>35.7</sub> | 1.75                                      | 1.6                                                  | 8.6                  |
| 4                     | Fe <sub>50</sub> Co <sub>20.8</sub> Ni <sub>29.2</sub>   | 2                                         | 1.77                                                 | 11.5                 |
| 5                     | Fe <sub>61.9</sub> Co <sub>22.8</sub> Ni <sub>15.3</sub> | 2.22                                      | 2.01                                                 | 9.5                  |
| Average Deviation (%) |                                                          |                                           |                                                      | 8.16                 |

**Table S20.** Deviation of  $T_c$  for the predicted composition for the first 5 BO sets using ETR model

| <b>BO Set</b>         | <b>Composition</b>                                       | <b>Predicted<br/><math>T_c</math> (K)</b> | <b>Approx.<br/>experimental <math>T_c</math> (K)</b> | <b>Deviation (%)</b> |
|-----------------------|----------------------------------------------------------|-------------------------------------------|------------------------------------------------------|----------------------|
| 1                     | Fe <sub>27.3</sub> Co <sub>25</sub> Ni <sub>47.7</sub>   | 935.8                                     | 1002                                                 | -7.1                 |
| 2                     | Fe <sub>44.7</sub> Co <sub>15.4</sub> Ni <sub>39.9</sub> | 846.3                                     | 890                                                  | -5.2                 |
| 3                     | Fe <sub>23.5</sub> Co <sub>40.8</sub> Ni <sub>35.7</sub> | 1063.8                                    | 1103.7                                               | -3.8                 |
| 4                     | Fe <sub>50</sub> Co <sub>20.8</sub> Ni <sub>29.2</sub>   | 872.5                                     | 1002                                                 | -14.8                |
| 5                     | Fe <sub>61.9</sub> Co <sub>22.8</sub> Ni <sub>15.3</sub> | 1047.5                                    | 1056.8                                               | -0.9                 |
| Average Deviation (%) |                                                          |                                           |                                                      | -6.36                |

**Table S21.** Deviation of  $Cost$  for the predicted composition for the first 5 BO sets using ETR model

| <b>BO Set</b> | <b>Composition</b>                                       | <b>Predicted<br/><math>Cost</math> (\$/kg)</b> | <b>Approx. calculated<br/><math>Cost</math> (\$/kg)</b> | <b>Deviation<br/>(%)</b> |
|---------------|----------------------------------------------------------|------------------------------------------------|---------------------------------------------------------|--------------------------|
| 1             | Fe <sub>27.3</sub> Co <sub>25</sub> Ni <sub>47.7</sub>   | 15                                             | 15.28                                                   | -1.9                     |
| 2             | Fe <sub>44.7</sub> Co <sub>15.4</sub> Ni <sub>39.9</sub> | 11.6                                           | 11.1                                                    | 4.3                      |
| 3             | Fe <sub>23.5</sub> Co <sub>40.8</sub> Ni <sub>35.7</sub> | 19                                             | 18.75                                                   | 1.3                      |
| 4             | Fe <sub>50</sub> Co <sub>20.8</sub> Ni <sub>29.2</sub>   | 10.7                                           | 11.48                                                   | -7.3                     |

|                       |                                                          |    |      |       |
|-----------------------|----------------------------------------------------------|----|------|-------|
| 5                     | Fe <sub>61.9</sub> Co <sub>22.8</sub> Ni <sub>15.3</sub> | 10 | 10.2 | -2    |
| Average Deviation (%) |                                                          |    |      | -1.12 |

**Table S22.** Deviation of  $H_c$  for the predicted composition for the first 5 BO sets using ETR model

| BO Set                | Composition                                              | Predicted $H_c$<br>(A/m) | Approx. experimental<br>$H_c$ (A/m) | Deviation<br>(%) |
|-----------------------|----------------------------------------------------------|--------------------------|-------------------------------------|------------------|
| 1                     | Fe <sub>27.3</sub> Co <sub>25</sub> Ni <sub>47.7</sub>   | 3.2                      | 385                                 | -11931.3         |
| 2                     | Fe <sub>44.7</sub> Co <sub>15.4</sub> Ni <sub>39.9</sub> | 44.4                     | 570                                 | -1183.8          |
| 3                     | Fe <sub>23.5</sub> Co <sub>40.8</sub> Ni <sub>35.7</sub> | 362.1                    | 290                                 | 19.9             |
| 4                     | Fe <sub>50</sub> Co <sub>20.8</sub> Ni <sub>29.2</sub>   | 352.2                    | 770                                 | -118.6           |
| 5                     | Fe <sub>61.9</sub> Co <sub>22.8</sub> Ni <sub>15.3</sub> | 549.5                    | 1350                                | -145.7           |
| Average Deviation (%) |                                                          |                          |                                     | -2671.9          |

**Table S23.** Deviation of  $\rho$  for the predicted composition for the first 5 BO sets using ETR model

| BO Set                | Composition                                              | Predicted $\rho$<br>( $\mu\Omega\cdot\text{cm}$ ) | Approx. experimental<br>$\rho$ ( $\mu\Omega\cdot\text{cm}$ ) | Deviation<br>(%) |
|-----------------------|----------------------------------------------------------|---------------------------------------------------|--------------------------------------------------------------|------------------|
| 1                     | Fe <sub>27.3</sub> Co <sub>25</sub> Ni <sub>47.7</sub>   | 20.7                                              | 22.8                                                         | -10.1            |
| 2                     | Fe <sub>44.7</sub> Co <sub>15.4</sub> Ni <sub>39.9</sub> | 23.3                                              | 40.3                                                         | -73              |
| 3                     | Fe <sub>23.5</sub> Co <sub>40.8</sub> Ni <sub>35.7</sub> | 18.7                                              | 31.5                                                         | -68.4            |
| 4                     | Fe <sub>50</sub> Co <sub>20.8</sub> Ni <sub>29.2</sub>   | 20.9                                              | 30                                                           | -43.5            |
| 5                     | Fe <sub>61.9</sub> Co <sub>22.8</sub> Ni <sub>15.3</sub> | 18.7                                              | 24.5                                                         | -31              |
| Average Deviation (%) |                                                          |                                                   |                                                              | -45.2            |

**Table S24.** Deviation of  $H_V$  for the predicted composition for the first 5 BO sets using ETR model

| BO Set                | Composition                                              | Predicted $H_V$<br>(HV) | Approx. experimental<br>$H_V$ (HV) | Deviation<br>(%) |
|-----------------------|----------------------------------------------------------|-------------------------|------------------------------------|------------------|
| 1                     | Fe <sub>27.3</sub> Co <sub>25</sub> Ni <sub>47.7</sub>   | 194.5                   | 198                                | -1.8             |
| 2                     | Fe <sub>44.7</sub> Co <sub>15.4</sub> Ni <sub>39.9</sub> | 294.4                   | 210                                | 28.7             |
| 3                     | Fe <sub>23.5</sub> Co <sub>40.8</sub> Ni <sub>35.7</sub> | 236.7                   | 188                                | 20.6             |
| 4                     | Fe <sub>50</sub> Co <sub>20.8</sub> Ni <sub>29.2</sub>   | 349                     | 248                                | 28.9             |
| 5                     | Fe <sub>61.9</sub> Co <sub>22.8</sub> Ni <sub>15.3</sub> | 347.1                   | 365                                | -5.2             |
| Average Deviation (%) |                                                          |                         |                                    | 14.24            |

**Table S25.** Deviation of  $M_s$  for the predicted composition for the first 5 BO sets using NNR\_4layers\_Wen model

| <b>BO Set</b>         | <b>Composition</b>                                       | <b>Predicted<br/><math>M_s</math> (T)</b> | <b>Approx.<br/>experimental <math>M_s</math> (T)</b> | <b>Deviation (%)</b> |
|-----------------------|----------------------------------------------------------|-------------------------------------------|------------------------------------------------------|----------------------|
| 1                     | Fe <sub>26.9</sub> Co <sub>26.3</sub> Ni <sub>46.8</sub> | 1.5                                       | 1.47                                                 | 2                    |
| 2                     | Fe <sub>41.7</sub> Co <sub>15.9</sub> Ni <sub>42.4</sub> | 1.75                                      | 1.56                                                 | 10.9                 |
| 3                     | Fe <sub>26.9</sub> Co <sub>47.8</sub> Ni <sub>25.3</sub> | 1.75                                      | 1.73                                                 | 1.1                  |
| 4                     | Fe <sub>46.4</sub> Co <sub>25.2</sub> Ni <sub>28.4</sub> | 2.01                                      | 1.79                                                 | 10.9                 |
| 5                     | Fe <sub>61.5</sub> Co <sub>18.9</sub> Ni <sub>19.6</sub> | 2.18                                      | 1.94                                                 | 11                   |
| Average Deviation (%) |                                                          |                                           |                                                      | 7.18                 |

**Table S26.** Deviation of  $T_c$  for the predicted composition for the first 5 BO sets using NNR\_4layers\_Wen model

| <b>BO Set</b>         | <b>Composition</b>                                       | <b>Predicted<br/><math>T_c</math> (K)</b> | <b>Approx.<br/>experimental <math>T_c</math> (K)</b> | <b>Deviation (%)</b> |
|-----------------------|----------------------------------------------------------|-------------------------------------------|------------------------------------------------------|----------------------|
| 1                     | Fe <sub>26.9</sub> Co <sub>26.3</sub> Ni <sub>46.8</sub> | 943.4                                     | 1005                                                 | -6.5                 |
| 2                     | Fe <sub>41.7</sub> Co <sub>15.9</sub> Ni <sub>42.4</sub> | 857                                       | 900                                                  | -5                   |
| 3                     | Fe <sub>26.9</sub> Co <sub>47.8</sub> Ni <sub>25.3</sub> | 1082.4                                    | 1155                                                 | -6.7                 |
| 4                     | Fe <sub>46.4</sub> Co <sub>25.2</sub> Ni <sub>28.4</sub> | 945.3                                     | 1029                                                 | -8.9                 |
| 5                     | Fe <sub>61.5</sub> Co <sub>18.9</sub> Ni <sub>19.6</sub> | 942.4                                     | 1000                                                 | -6.1                 |
| Average Deviation (%) |                                                          |                                           |                                                      | -6.64                |

**Table S27.** Deviation of  $Cost$  for the predicted composition for the first 5 BO sets using NNR\_4layers\_Wen model

| <b>BO Set</b>         | <b>Composition</b>                                       | <b>Predicted<br/><math>Cost</math> (\$/kg)</b> | <b>Approx. calculated<br/><math>Cost</math> (\$/kg)</b> | <b>Deviation<br/>(%)</b> |
|-----------------------|----------------------------------------------------------|------------------------------------------------|---------------------------------------------------------|--------------------------|
| 1                     | Fe <sub>26.9</sub> Co <sub>26.3</sub> Ni <sub>46.8</sub> | 15.2                                           | 15.5                                                    | -2                       |
| 2                     | Fe <sub>41.7</sub> Co <sub>15.9</sub> Ni <sub>42.4</sub> | 11.5                                           | 11.6                                                    | -0.9                     |
| 3                     | Fe <sub>26.9</sub> Co <sub>47.8</sub> Ni <sub>25.3</sub> | 20                                             | 19.9                                                    | 0.5                      |
| 4                     | Fe <sub>46.4</sub> Co <sub>25.2</sub> Ni <sub>28.4</sub> | 12.5                                           | 12.7                                                    | -1.6                     |
| 5                     | Fe <sub>61.5</sub> Co <sub>18.9</sub> Ni <sub>19.6</sub> | 9.8                                            | 9.59                                                    | 2.1                      |
| Average Deviation (%) |                                                          |                                                |                                                         | -0.38                    |

**Table S28.** Deviation of  $H_c$  for the predicted composition for the first 5 BO sets using NNR\_4layers\_Wen model

| BO Set                | Composition                                              | Predicted $H_c$<br>(A/m) | Approx. experimental<br>$H_c$ (A/m) | Deviation<br>(%) |
|-----------------------|----------------------------------------------------------|--------------------------|-------------------------------------|------------------|
| 1                     | Fe <sub>26.9</sub> Co <sub>26.3</sub> Ni <sub>46.8</sub> | 117.9                    | 385                                 | -226.5           |
| 2                     | Fe <sub>41.7</sub> Co <sub>15.9</sub> Ni <sub>42.4</sub> | 58.2                     | 485.29                              | -733.8           |
| 3                     | Fe <sub>26.9</sub> Co <sub>47.8</sub> Ni <sub>25.3</sub> | 903.3                    | 454                                 | 49.7             |
| 4                     | Fe <sub>46.4</sub> Co <sub>25.2</sub> Ni <sub>28.4</sub> | 378.3                    | 529                                 | -39.8            |
| 5                     | Fe <sub>61.5</sub> Co <sub>18.9</sub> Ni <sub>19.6</sub> | 506.1                    | 1520.6                              | -200.5           |
| Average Deviation (%) |                                                          |                          |                                     | -230.18          |

**Table S29.** Deviation of  $\rho$  for the predicted composition for the first 5 BO sets using NNR\_4layers\_Wen model

| BO Set                | Composition                                              | Predicted $\rho$<br>( $\mu\Omega\cdot\text{cm}$ ) | Approx. experimental<br>$\rho$ ( $\mu\Omega\cdot\text{cm}$ ) | Deviation<br>(%) |
|-----------------------|----------------------------------------------------------|---------------------------------------------------|--------------------------------------------------------------|------------------|
| 1                     | Fe <sub>26.9</sub> Co <sub>26.3</sub> Ni <sub>46.8</sub> | 17.3                                              | 22.8                                                         | -31.8            |
| 2                     | Fe <sub>41.7</sub> Co <sub>15.9</sub> Ni <sub>42.4</sub> | 21.5                                              | 37.8                                                         | -75.8            |
| 3                     | Fe <sub>26.9</sub> Co <sub>47.8</sub> Ni <sub>25.3</sub> | 16.8                                              | 23                                                           | -36.9            |
| 4                     | Fe <sub>46.4</sub> Co <sub>25.2</sub> Ni <sub>28.4</sub> | 18.5                                              | 26.5                                                         | -43.2            |
| 5                     | Fe <sub>61.5</sub> Co <sub>18.9</sub> Ni <sub>19.6</sub> | 18.9                                              | 27.2                                                         | -43.9            |
| Average Deviation (%) |                                                          |                                                   |                                                              | -46.32           |

**Table S30.** Deviation of  $H_V$  for the predicted composition for the first 5 BO sets using NNR\_4layers\_Wen model

| BO Set                | Composition                                              | Predicted $H_V$<br>(HV) | Approx. experimental<br>$H_V$ (HV) | Deviation<br>(%) |
|-----------------------|----------------------------------------------------------|-------------------------|------------------------------------|------------------|
| 1                     | Fe <sub>26.9</sub> Co <sub>26.3</sub> Ni <sub>46.8</sub> | 244.1                   | 200.9                              | 17.7             |
| 2                     | Fe <sub>41.7</sub> Co <sub>15.9</sub> Ni <sub>42.4</sub> | 260.4                   | 207                                | 20.5             |
| 3                     | Fe <sub>26.9</sub> Co <sub>47.8</sub> Ni <sub>25.3</sub> | 305.9                   | 200                                | 34.6             |
| 4                     | Fe <sub>46.4</sub> Co <sub>25.2</sub> Ni <sub>28.4</sub> | 360.4                   | 220                                | 39               |
| 5                     | Fe <sub>61.5</sub> Co <sub>18.9</sub> Ni <sub>19.6</sub> | 416.8                   | 406.4                              | 2.5              |
| Average Deviation (%) |                                                          |                         |                                    | 22.86            |

## References

- 1 Li, L., Jamieson, K., DeSalvo, G., Rostamizadeh, A. & Talwalkar, A. Hyperband: A novel bandit-based approach to hyperparameter optimization. *The Journal of Machine Learning Research* **18**, 6765-6816 (2017).
- 2 O'Malley, T., Bursztein, E., Long, J., Chollet, F., Jin, H. & Invernizzi, L. KerasTuner. (2019).
- 3 Head, T., Kumar, M., Nahrstaedt, H., Louppe, G. & Shcherbatyi, I. scikit-optimize. *Zenodo* (2021). <https://doi.org/10.5281/zenodo.5565057>
- 4 Brochu, E., Cora, V. M. & De Freitas, N. A tutorial on Bayesian optimization of expensive cost functions, with application to active user modeling and hierarchical reinforcement learning. *arXiv preprint arXiv:1012.2599* (2010).
- 5 Frazier, P. I. & Wang, J. in *Information Science for Materials Discovery and Design Springer Series in Materials Science* (eds Turab Lookman, Francis J. Alexander, & Krishna Rajan) Ch. Chapter 3, 45-75 (Springer International Publishing, 2016).
- 6 Moćkus, J. in *Optimization Techniques IFIP Technical Conference* (ed G. I. Marchuk) Ch. Chapter 55, 400-404 (Springer Berlin Heidelberg, 1975).
- 7 Jones, D. R., Schonlau, M. & Welch, W. J. Efficient Global Optimization of Expensive Black-Box Functions. *Journal of Global Optimization* **13**, 455-492 (1998). <https://doi.org/10.1023/a:1008306431147>
